# Supplementary material for: Multicomponent Mendelian randomization and machine learning studies of potential drug targets for neurodegenerative diseases
Source: Research Square preprint supplement (doi:10.21203/rs.3.rs-5848172/v1), 2025-04-18
Supplement: Supplementary file 1 [file 0c2aa55cd68e94276efaec8e.xlsx]

## Sheet: index
	Table S1. Mendelian randomization analysis for Expose and Outcome Data in study
	Table S2. Machine Learning analysis Data in study
	Table S3. Summary data-level Mendelian randomization analysis for association between eQTL,mQTL,sQTL,pQTL and AD in discovery stage
	Table S4. Summary data-level Mendelian randomization analysis for association between eQTL, mQTL, sQTL, pQTL and PD in discovery stage
	Table S5. multi-variant Mendelian randomization analysis for eQTL, mQTL, sQTL, pQTL and AD in discovery stage
	Table S6. multi-variant Mendelian randomization analysis for eQTL, mQTL, sQTL, pQTL and PD in discovery stage
	Table S7. Colocalization analysis for association between eQTL, mQTL, sQTL, pQTL and AD in discovery stage
	Table S8. Colocalization analysis for association between eQTL, mQTL, sQTL, pQTL and PD in discovery stage
	Table S9. Machine Learning analysis between Gene and NDDs in Study
	Table S10. Association targeted drug
	Table S11. The interaction of molecular docking
	Table S12. The insilico pharmacokinetics and toxicity of targeted drug
	Table S13. Association targeted drug and candidate gene

## Sheet: Table S1
	Table S1. Mendelian randomization analysis for Expose and Outcome Data in study
	Table 1. Descriptive summary of xQTL datasets used for Mendelian randomization analysis.
	Expose	QTL category	QTL study	Sample size	Tissue	Reference	URL
		eQTL	BrainMeta	2865	Brain	Qi, T. et al. Nat Genet. 2022	https://www.nature.com/articles/s41588-022-01154-4
			eQTLGen	31684	Blood	Võsa, U. et al. Nat Genet. 2021	https://www.nature.com/articles/s41588-021-00913-z
			GTEx_Whole_Blood	755	Blood	Consortium, G. Science. 2020	https://www.science.org/doi/10.1126/science.aaz1776
		mQTL	BrainMeta	1160	Brain	Qi, T. et al. Nat Commun. 2018	https://www.nature.com/articles/s41467-018-04558-1
			McRae	1980	Blood	McRae, A. F. et al. Sci Rep. 2018	https://www.nature.com/articles/s41598-018-35871-w
		sQTL	BrainMeta	2865	Brain	Qi, T. et al. Nat Genet. 2022	https://www.nature.com/articles/s41588-022-01154-4
			GTEx_Whole_Blood	755	Blood	Consortium, G. Science. 2020	https://www.science.org/doi/10.1126/science.aaz1776
		pQTL	SCALLOP	30931	Blood	Folkersen, L. et al. Nat Metab. 2020	https://www.nature.com/articles/s42255-020-00287-2
			FENLAND	10708	Blood	Pietzner et al. 2021 Science	'https://www.science.org/doi/10.1126/science.abj1541
			INTERVAL	3301	Blood	Sun, B. B. et al. Nature. 2018	https://www.nature.com/articles/s41586-018-0175-2
	Table 2. Descriptive summary of the GWAS datasets used for Mendelian randomization analysis.
	Outcome	Trait	study		Sample(case)	Sample(control)	URL
		PD	Open gwas(Ieu-b-7)		33674	449056	https://gwas.mrcieu.ac.uk/datasets/ieu-b-7/
		AD	finngen(finngen_R9_G6_ALZHEIME)		9301	392423	https://r9.risteys.finngen.fi/endpoints/G6_ALZHEIMER

## Sheet: Table S2
	Table S2. Machine Learning analysis Data in study
	database	study	Sample size	Tissue	Disease	URL
	GEO	GSE110226	20	Human Brain	AD	https://www.ncbi.nlm.nih.gov/geo/query/acc.cgi
		GSE156926	18	Human Brain	PD

## Sheet: Table S3
	Table S3. Summary data-level Mendelian randomization analysis for association between eQTL,mQTL,sQTL,pQTL and AD in discovery stage
	gene	gene_id	chr	qtl_name	SMR association			FDR_SMR	OR(95%CI)	HEIDI		nsnp_HEIDI
					b_SMR	se_SMR	p_SMR			p_HEIDI	FDR_HEIDI
	RASA4B	ENSG00000170667	7	sQTL_BrainMeta	-0.0564228	0.0225354	0.0122889	0.0239075	0.95(0.90 to 0.99)	0.0877711	0.72456	20
	HEXIM2	ENSG00000168517	17	pQTL_FENLAND	-0.333989	0.138939	0.0162233	0.0291857	0.72(0.55 to 0.94)	0.102891	0.72456	20
	TNFSF13B	ENSG00000102524	13	pQTL_FENLAND	-0.496608	0.197796	0.012049	0.0239075	0.61(0.41 to 0.90)	0.113741	0.72456	20
	CD5L	ENSG00000073754	1	pQTL_FENLAND	0.125265	0.0426827	0.00333756	0.0155269	1.13(1.04 to 1.23)	0.176786	0.727542	20
	CD33	ENSG00000105383	19	pQTL_FENLAND	0.0447828	0.0176186	0.0110285	0.0227572	1.05(1.01 to 1.08)	0.20726	0.748693	20
	FAM20A	ENSG00000108950	17	pQTL_FENLAND	-0.259051	0.101322	0.0105667	0.0227572	0.77(0.63 to 0.94)	0.251178	0.790656	20
	TAGLN	ENSG00000149591	11	pQTL_FENLAND	0.322001	0.152816	0.0351073	0.0426872	1.38(1.02 to 1.86)	0.324592	0.790656	20
	ALPP	ENSG00000163283	2	pQTL_FENLAND	-0.119259	0.0452238	0.00836213	0.0219704	0.89(0.81 to 0.97)	0.339908	0.790656	20
	BPHL	ENSG00000137274	6	pQTL_FENLAND	0.0761001	0.0325798	0.0195014	0.0320722	1.08(1.01 to 1.15)	0.617912	0.880783	20
	HTRA1	ENSG00000166033	10	pQTL_FENLAND	-0.305094	0.13383	0.0226248	0.0337117	0.74(0.57 to 0.96)	0.677451	0.883992	20
	HDHD2	ENSG00000167220	18	pQTL_FENLAND	0.140702	0.0596478	0.0183303	0.0314002	1.15(1.02 to 1.29)	0.722829	0.896456	20
	RNASE4	ENSG00000258818	14	pQTL_FENLAND	-0.0849868	0.0421372	0.0437054	0.04679	0.92(0.85 to 1.00)	0.954764	0.982305	20
	INIP	ENSG00000148153	9	eQTLGen	-0.122517	0.06103	0.0446978	0.0470013	0.88(0.78 to 1.00)	0.0673947	0.72456	20
	COMMD10	ENSG00000145781	5	eQTLGen	0.19535	0.0491127	6.96192e-05	0.00372463	1.22(1.10 to 1.34)	0.0749764	0.72456	20
	CDK10	ENSG00000185324	16	eQTL_BrainMeta	0.0872247	0.0256118	0.000660086	0.0101609	1.09(1.04 to 1.15)	0.075819	0.72456	20
	MYBPC3	ENSG00000134571	11	eQTL_GTEx_Whole_Blood	0.234615	0.0819139	0.00418109	0.0159777	1.26(1.08 to 1.48)	0.0771216	0.72456	20
	INVS	ENSG00000119509	9	eQTLGen	-0.220765	0.0641185	0.000575119	0.0101609	0.80(0.71 to 0.91)	0.0825117	0.72456	20
	NAA60	ENSG00000122390	16	eQTLGen	0.194311	0.0581742	0.000837292	0.0101609	1.21(1.08 to 1.36)	0.0831656	0.72456	20
	PRPSAP1	ENSG00000161542	17	eQTLGen	-0.345754	0.114607	0.00255397	0.014957	0.71(0.57 to 0.89)	0.0983474	0.72456	20
	ARL17B	ENSG00000228696	17	eQTL_BrainMeta	-0.0473708	0.022371	0.0342165	0.0425118	0.95(0.91 to 1.00)	0.109467	0.72456	3
	ZNF23	ENSG00000167377	16	eQTLGen	0.14501	0.0635668	0.0225357	0.0337117	1.16(1.02 to 1.31)	0.125176	0.72456	20
	TBK1	ENSG00000183735	12	eQTLGen	0.267452	0.0645687	3.44105e-05	0.00368192	1.31(1.15 to 1.48)	0.127641	0.72456	20
	HPS6	ENSG00000166189	10	eQTLGen	-0.11347	0.0488088	0.0200835	0.0320736	0.89(0.81 to 0.98)	0.136268	0.72456	20
	MAU2	ENSG00000129933	19	eQTLGen	-0.0478664	0.0239396	0.0455581	0.0473274	0.95(0.91 to 1.00)	0.137828	0.72456	20
	THRA	ENSG00000126351	17	eQTLGen	-0.126482	0.0471378	0.00729137	0.0219704	0.88(0.80 to 0.97)	0.152459	0.72456	20
	FAM118B	ENSG00000197798	11	eQTLGen	-0.115125	0.0413776	0.00539754	0.0192512	0.89(0.82 to 0.97)	0.16186	0.72456	20
	LRRC37A	ENSG00000176681	17	eQTL_GTEx_Whole_Blood	-0.0769976	0.0290505	0.00803793	0.0219704	0.93(0.87 to 0.98)	0.16929	0.72456	6
	GTF2A2	ENSG00000140307	15	eQTLGen	0.0934251	0.0473532	0.0485023	0.0485023	1.10(1.00 to 1.20)	0.206749	0.748693	20
	CCDC82	ENSG00000149231	11	eQTLGen	-0.0976556	0.0389778	0.0122308	0.0239075	0.91(0.84 to 0.98)	0.225189	0.777266	20
	CCDC25	ENSG00000147419	8	eQTL_BrainMeta	-0.0473486	0.0232851	0.0420088	0.04679	0.95(0.91 to 1.00)	0.253537	0.790656	20
	PITPNA	ENSG00000174238	17	eQTLGen	0.12662	0.0465365	0.00651093	0.0217709	1.13(1.04 to 1.24)	0.255565	0.790656	20
	BASP1	ENSG00000176788	5	eQTLGen	0.138148	0.0618252	0.0254505	0.0358468	1.15(1.02 to 1.30)	0.286406	0.790656	20
	MSRB2	ENSG00000148450	10	eQTLGen	0.0951416	0.0301431	0.00159768	0.0141477	1.10(1.04 to 1.17)	0.309358	0.790656	20
	EPHB4	ENSG00000196411	7	eQTLGen	0.0851164	0.0275215	0.00198332	0.0141477	1.09(1.03 to 1.15)	0.318202	0.790656	20
	AP2S1	ENSG00000042753	19	eQTLGen	-0.30159	0.115683	0.00913307	0.0219704	0.74(0.59 to 0.93)	0.318614	0.790656	20
	ELMO1	ENSG00000155849	7	eQTLGen	-0.118412	0.0391184	0.00246988	0.014957	0.89(0.82 to 0.96)	0.319556	0.790656	20
	INPP5D	ENSG00000168918	2	eQTLGen	-0.2268	0.0944742	0.0163658	0.0291857	0.80(0.66 to 0.96)	0.326537	0.790656	20
	MYO1C	ENSG00000197879	17	eQTLGen	-0.619488	0.224558	0.00580306	0.0200299	0.54(0.35 to 0.84)	0.333361	0.790656	20
	NQO2	ENSG00000124588	6	eQTLGen	-0.0448942	0.0220843	0.0420672	0.04679	0.96(0.92 to 1.00)	0.359135	0.798714	20
	NEBL	ENSG00000078114	10	eQTLGen	0.0463768	0.0219061	0.034254	0.0425118	1.05(1.00 to 1.09)	0.40127	0.805104	20
	RAPGEF3	ENSG00000079337	12	eQTLGen	0.130271	0.064597	0.043729	0.04679	1.14(1.00 to 1.29)	0.408663	0.805104	20
	SF3A1	ENSG00000099995	22	eQTLGen	-0.116182	0.0372683	0.00182426	0.0141477	0.89(0.83 to 0.96)	0.420705	0.805104	20
	NIP7	ENSG00000132603	16	eQTLGen	0.1828	0.0576395	0.0015169	0.0141477	1.20(1.07 to 1.34)	0.421158	0.805104	20
	EIF3D	ENSG00000100353	22	eQTLGen	0.249716	0.117649	0.0337919	0.0425118	1.28(1.02 to 1.62)	0.443107	0.805104	20
	TTC38	ENSG00000075234	22	eQTLGen	0.123744	0.0553832	0.0254613	0.0358468	1.13(1.02 to 1.26)	0.4684	0.821621	20
	SLC66A2	ENSG00000122490	18	eQTL_BrainMeta	0.132722	0.0590783	0.0246688	0.0358468	1.14(1.02 to 1.28)	0.516148	0.865426	20
	OSER1	ENSG00000132823	20	eQTLGen	-0.0869208	0.0329116	0.0082652	0.0219704	0.92(0.86 to 0.98)	0.531866	0.865426	20
	RASA4B	ENSG00000170667	7	eQTL_BrainMeta	0.0396259	0.0199616	0.047132	0.0480298	1.04(1.00 to 1.08)	0.535023	0.865426	20
	STAG3	ENSG00000066923	7	eQTLGen	-0.0808368	0.0390964	0.0386748	0.0454748	0.92(0.85 to 1.00)	0.547844	0.865426	20
	PTPN12	ENSG00000127947	7	eQTLGen	0.131604	0.0437958	0.00265634	0.014957	1.14(1.05 to 1.24)	0.547972	0.865426	20
	BDH2	ENSG00000164039	4	eQTLGen	0.0629192	0.0305774	0.0396187	0.0460783	1.06(1.00 to 1.13)	0.556299	0.865426	20
	OSBPL3	ENSG00000070882	7	eQTLGen	0.117782	0.0580367	0.0424133	0.04679	1.12(1.00 to 1.26)	0.566167	0.865426	20
	MYO1F	ENSG00000142347	19	eQTLGen	0.421626	0.125347	0.000769122	0.0101609	1.52(1.19 to 1.95)	0.581816	0.871116	18
	HDHD2	ENSG00000167220	18	eQTLGen	0.106897	0.0450176	0.0175702	0.0308199	1.11(1.02 to 1.22)	0.586171	0.871116	20
	GRAMD1B	ENSG00000023171	11	eQTLGen	-0.193138	0.097545	0.0477046	0.0481546	0.82(0.68 to 1.00)	0.611316	0.880783	13
	SMARCD2	ENSG00000108604	17	eQTLGen	0.148428	0.0568608	0.00904418	0.0219704	1.16(1.04 to 1.30)	0.640074	0.880783	20
	ZNF205	ENSG00000122386	16	eQTLGen	-0.139982	0.0382826	0.000255646	0.00911804	0.87(0.81 to 0.94)	0.65198	0.880783	20
	TNK2	ENSG00000061938	3	eQTLGen	0.692506	0.240153	0.00393158	0.0159777	2.00(1.25 to 3.20)	0.665071	0.880783	20
	NME5	ENSG00000112981	5	eQTL_BrainMeta	0.0542017	0.0242444	0.0253755	0.0358468	1.06(1.01 to 1.11)	0.665157	0.880783	20
	PYGB	ENSG00000100994	20	eQTLGen	-0.0547447	0.0211513	0.00964676	0.0224392	0.95(0.91 to 0.99)	0.743266	0.896456	20
	SPCS3	ENSG00000129128	4	eQTLGen	-0.202725	0.0912621	0.0263271	0.0365844	0.82(0.68 to 0.98)	0.744085	0.896456	20
	TADA3	ENSG00000171148	3	eQTLGen	0.0938373	0.0432196	0.0299182	0.0410416	1.10(1.01 to 1.20)	0.744313	0.896456	20
	SLC15A4	ENSG00000139370	12	eQTLGen	0.17051	0.0834489	0.0410239	0.04679	1.19(1.01 to 1.40)	0.758579	0.901866	20
	RNF112	ENSG00000128482	17	eQTLGen	-0.136952	0.0587664	0.0197829	0.0320722	0.87(0.78 to 0.98)	0.785709	0.917089	20
	ABHD17C	ENSG00000136379	15	eQTLGen	0.0739263	0.0346648	0.0329571	0.0425118	1.08(1.01 to 1.15)	0.802791	0.923641	20
	CHD7	ENSG00000171316	8	eQTLGen	0.222507	0.074807	0.0029355	0.014957	1.25(1.08 to 1.45)	0.847459	0.932768	20
	TPK1	ENSG00000196511	7	eQTLGen	0.0800044	0.0380515	0.0355068	0.042688	1.08(1.01 to 1.17)	0.856002	0.932768	20
	SYTL2	ENSG00000137501	11	eQTLGen	-0.117166	0.0442783	0.00814199	0.0219704	0.89(0.82 to 0.97)	0.858813	0.932768	20
	HECTD3	ENSG00000126107	1	eQTLGen	-0.408241	0.174603	0.0193817	0.0320722	0.66(0.47 to 0.94)	0.865348	0.932768	4
	ZNF330	ENSG00000109445	4	eQTLGen	-0.152921	0.0758041	0.0436619	0.04679	0.86(0.74 to 1.00)	0.913929	0.958729	20
	MERTK	ENSG00000153208	2	eQTLGen	-0.0729066	0.0300243	0.0151719	0.0279896	0.93(0.88 to 0.99)	0.944486	0.981165	20
	RPL9	ENSG00000163682	4	eQTL_BrainMeta	-0.0313703	0.0137667	0.0226845	0.0337117	0.97(0.94 to 1.00)	0.967052	0.985472	20
	CAPSL	ENSG00000152611	5	eQTL_BrainMeta	0.145281	0.0636525	0.0224655	0.0337117	1.16(1.02 to 1.31)	0.997389	0.997389	20
	POM121L2	ENSG00000158553	6	mQTL_McRae	-0.204562	0.0585914	0.000480618	0.0101609	0.82(0.73 to 0.91)	0.0684461	0.72456	20
	MAP3K14	ENSG00000006062	17	mQTL_BrainMeta	-0.0780783	0.0234156	0.000854654	0.0101609	0.92(0.88 to 0.97)	0.205536	0.748693	9
	DOK7	ENSG00000175920	4	mQTL_McRae	-0.0699829	0.0220839	0.00152984	0.0141477	0.93(0.89 to 0.97)	0.0535343	0.72456	20
	NOL10	ENSG00000115761	2	mQTL_BrainMeta	0.0496764	0.0159616	0.0018567	0.0141477	1.05(1.02 to 1.08)	0.375959	0.804553	20
	NMS	ENSG00000204640	2	mQTL_McRae	0.0392162	0.0131017	0.00276053	0.014957	1.04(1.01 to 1.07)	0.521111	0.865426	20
	B3GAT1	ENSG00000109956	11	mQTL_BrainMeta	-0.0967304	0.0324925	0.00291079	0.014957	0.91(0.85 to 0.97)	0.828565	0.932768	16
	IDH3A	ENSG00000166411	15	mQTL_McRae	-0.0950395	0.0321881	0.00315081	0.0153244	0.91(0.85 to 0.97)	0.0877241	0.72456	20
	ABCA1	ENSG00000165029	9	mQTL_McRae	-0.0325447	0.011218	0.00371853	0.0159777	0.97(0.95 to 0.99)	0.745651	0.896456	20
	HABP4	ENSG00000130956	9	mQTL_McRae	0.17662	0.0614809	0.00406899	0.0159777	1.19(1.06 to 1.35)	0.300554	0.790656	20
	VPS13C	ENSG00000129003	15	mQTL_McRae	-0.0378905	0.0132107	0.00412864	0.0159777	0.96(0.94 to 0.99)	0.440095	0.805104	20
	VWDE	ENSG00000146530	7	mQTL_McRae	-0.0459249	0.0162412	0.00468882	0.0173001	0.96(0.93 to 0.99)	0.362296	0.798714	20
	SPACA7	ENSG00000153498	13	mQTL_McRae	-0.0329808	0.0122641	0.00716199	0.0219704	0.97(0.94 to 0.99)	0.0849806	0.72456	20
	PXDN	ENSG00000130508	2	mQTL_BrainMeta	0.0493416	0.0185366	0.00777117	0.0219704	1.05(1.01 to 1.09)	0.822369	0.932768	20
	F2RL3	ENSG00000127533	19	mQTL_McRae	-0.0313409	0.0119248	0.00858328	0.0219704	0.97(0.95 to 0.99)	0.666761	0.880783	20
	STK39	ENSG00000198648	2	mQTL_McRae	0.208277	0.0793991	0.00871182	0.0219704	1.23(1.05 to 1.44)	0.365766	0.798714	20
	CDC7	ENSG00000097046	1	mQTL_McRae	-0.0297873	0.0114433	0.0092399	0.0219704	0.97(0.95 to 0.99)	0.266156	0.790656	20
	TSC22D4	ENSG00000166925	7	mQTL_McRae	-0.0371128	0.0144448	0.0101909	0.0227572	0.96(0.94 to 0.99)	0.558995	0.865426	20
	FAM171A1	ENSG00000148468	10	mQTL_McRae	-0.0872488	0.0339739	0.0102253	0.0227572	0.92(0.86 to 0.98)	0.16436	0.72456	20
	TMEM176B	ENSG00000106565	7	mQTL_McRae	0.0527119	0.0207018	0.010889	0.0227572	1.05(1.01 to 1.10)	0.788525	0.917089	20
	FXYD6	ENSG00000137726	11	mQTL_McRae	0.092044	0.0362262	0.0110596	0.0227572	1.10(1.02 to 1.18)	0.45146	0.805104	15
	IQCE	ENSG00000106012	7	mQTL_BrainMeta	0.0974952	0.0391946	0.0128657	0.0245827	1.10(1.02 to 1.19)	0.0814211	0.72456	20
	ETV1	ENSG00000006468	7	mQTL_McRae	0.0342169	0.0140001	0.0145237	0.0272637	1.03(1.01 to 1.06)	0.991888	0.997389	20
	BTN2A2	ENSG00000124508	6	mQTL_McRae	0.0752026	0.0319237	0.0184879	0.0314002	1.08(1.01 to 1.15)	0.651133	0.880783	20
	WDR37	ENSG00000047056	10	mQTL_BrainMeta	-0.0819236	0.0355338	0.021138	0.0332612	0.92(0.86 to 0.99)	0.871745	0.932768	14
	UBE2I	ENSG00000103275	16	mQTL_BrainMeta	-0.0357275	0.016524	0.0306058	0.0412309	0.96(0.93 to 1.00)	0.42345	0.805104	20
	BRSK2	ENSG00000174672	11	mQTL_McRae	-0.0267699	0.0123975	0.0308268	0.0412309	0.97(0.95 to 1.00)	0.649954	0.880783	20
	PCBP4	ENSG00000090097	3	mQTL_McRae	0.100557	0.046718	0.0313631	0.0414302	1.11(1.01 to 1.21)	0.209914	0.748693	12
	LIMCH1	ENSG00000064042	4	mQTL_McRae	0.0456444	0.0214216	0.0331084	0.0425118	1.05(1.00 to 1.09)	0.156287	0.72456	20
	TK2	ENSG00000166548	16	mQTL_McRae	-0.0408861	0.019346	0.0345657	0.0425118	0.96(0.92 to 1.00)	0.741105	0.896456	20
	CRYGD	ENSG00000118231	2	mQTL_McRae	0.0442526	0.0213935	0.0385925	0.0454748	1.05(1.00 to 1.09)	0.273996	0.790656	20
	KCNA6	ENSG00000151079	12	mQTL_BrainMeta	-0.0634223	0.0312709	0.0425444	0.04679	0.94(0.88 to 1.00)	0.448131	0.805104	20
	DIP2A	ENSG00000160305	21	mQTL_McRae	0.0512462	0.0255403	0.044805	0.0470013	1.05(1.00 to 1.11)	0.443373	0.805104	20
	CABP5	ENSG00000105507	19	mQTL_BrainMeta	-0.0883809	0.0443506	0.0462858	0.0476209	0.92(0.84 to 1.00)	0.728675	0.896456	10
	TRMT112	ENSG00000173113	11	eQTLGen	-0.00058812	0.000220124	0.00754536	0.0219704	1.00(1.00 to 1.00)	0.895818	0.949035	20
	* Only presented the association with P value after FDR adjustment < 0.05 and P for HEIDI test >0.05
	CI, confidence interval; FDR, false dicovery rate; HEIDI, heterogeneity in dependent instruments; SNP, single nucleotide polymorphsim; OR odds ratio

## Sheet: Table S4
	Table S4. Summary data-level Mendelian randomization analysis for association between eQTL, mQTL, sQTL, pQTL and PD in discovery stage
	index	qtl_name	gene_id	chr	SMR association			FDR_SMR	OR(95%CI)	HEIDI		nsnp_HEIDI
					b_SMR	se_SMR	p_SMR			p_HEIDI	FDR_HEIDI
	PAM	pQTL_INTERVAL	ENSG00000145730	5	0.100986	0.03939	0.0103547	0.0352374	1.11(1.02 to 1.20)	0.488124	0.848889	20
	EFEMP1	pQTL_FENLAND	ENSG00000115380	2	0.22218	0.0871666	0.010806	0.0352374	1.25(1.05 to 1.48)	0.160943	0.778858	20
	CDNF	pQTL_INTERVAL	ENSG00000185267	10	-0.186398	0.0758291	0.0139664	0.0352374	0.83(0.72 to 0.96)	0.0525245	0.778858	3
	MAGI2	pQTL_FENLAND	ENSG00000187391	7	-0.0782332	0.034969	0.0252721	0.0387728	0.92(0.86 to 0.99)	0.210951	0.778858	20
	GGH	pQTL_FENLAND	ENSG00000137563	8	0.107721	0.0486738	0.026889	0.0387728	1.11(1.01 to 1.23)	0.604712	0.87852	20
	PCGF3	sQTL_GTEx_Whole_Blood	ENSG00000185619	4	0.0608645	0.0208936	0.00357895	0.0238597	1.06(1.02 to 1.11)	0.207608	0.778858	20
	KPNA1	eQTLGen	ENSG00000114030	3	0.375359	0.105717	0.000384338	0.0193265	1.46(1.18 to 1.79)	0.272874	0.778858	20
	ASF1A	eQTLGen	ENSG00000111875	6	0.176226	0.0506573	0.000503696	0.0193265	1.19(1.08 to 1.32)	0.108743	0.778858	20
	EIF3C	eQTL_BrainMeta	ENSG00000184110	16	-0.154685	0.0458497	0.00074157	0.020764	0.86(0.78 to 0.94)	0.612076	0.87852	20
	ENPP4	eQTLGen	ENSG00000001561	6	0.120939	0.0374731	0.00124946	0.0212004	1.13(1.05 to 1.21)	0.132847	0.778858	20
	CHRNB1	eQTLGen	ENSG00000170175	17	0.190651	0.0601463	0.00152555	0.0212004	1.21(1.08 to 1.36)	0.533698	0.848889	20
	CNNM4	eQTLGen	ENSG00000158158	2	-0.272786	0.0869771	0.00171093	0.0212004	0.76(0.64 to 0.90)	0.773315	0.925334	20
	CEP85L	eQTLGen	ENSG00000111860	6	-0.272512	0.087304	0.00179983	0.0212004	0.76(0.64 to 0.90)	0.152742	0.778858	20
	TRAT1	eQTLGen	ENSG00000163519	3	0.222317	0.0715177	0.00188005	0.0212004	1.25(1.09 to 1.44)	0.308401	0.791648	20
	SLC25A1	eQTLGen	ENSG00000100075	22	0.214658	0.0693724	0.00197292	0.0212004	1.24(1.08 to 1.42)	0.579931	0.873014	20
	PCYOX1	eQTLGen	ENSG00000116005	2	-0.431483	0.140634	0.002154	0.0212004	0.65(0.49 to 0.86)	0.725879	0.923846	20
	PDZK1IP1	eQTLGen	ENSG00000162366	1	-0.0967423	0.0331235	0.00349293	0.0238597	0.91(0.85 to 0.97)	0.0612258	0.778858	20
	ANKMY1	eQTL_BrainMeta	ENSG00000144504	2	-0.121876	0.0435439	0.00512722	0.0307632	0.89(0.81 to 0.96)	0.878994	0.968051	20
	CERS5	eQTLGen	ENSG00000139624	12	0.0727096	0.026539	0.006149	0.03311	1.08(1.02 to 1.13)	0.859699	0.968051	20
	BOK	eQTLGen	ENSG00000176720	2	0.19226	0.0718903	0.00748734	0.0352374	1.21(1.05 to 1.40)	0.628207	0.882911	20
	IKBIP	eQTLGen	ENSG00000166130	12	0.1855	0.0713238	0.00930017	0.0352374	1.20(1.05 to 1.38)	0.526107	0.848889	20
	POMT2	eQTL_BrainMeta	ENSG00000009830	14	0.114178	0.0442979	0.00995163	0.0352374	1.12(1.03 to 1.22)	0.214601	0.778858	20
	SULT1A2	eQTLGen	ENSG00000197165	16	-0.0979779	0.0380416	0.0100081	0.0352374	0.91(0.84 to 0.98)	0.0669191	0.778858	20
	PEX6	eQTL_BrainMeta	ENSG00000124587	6	0.0384187	0.0151391	0.0111581	0.0352374	1.04(1.01 to 1.07)	0.940965	0.977502	20
	KCNB1	eQTLGen	ENSG00000158445	20	0.226301	0.0896988	0.0116391	0.0352374	1.25(1.05 to 1.49)	0.361896	0.791648	20
	GLIS3	eQTLGen	ENSG00000107249	9	-0.438438	0.173988	0.0117378	0.0352374	0.65(0.46 to 0.91)	0.788611	0.932519	11
	SCD5	eQTL_BrainMeta	ENSG00000145284	4	0.0819097	0.0328988	0.0127833	0.0352374	1.09(1.02 to 1.16)	0.0626808	0.778858	20
	GNPDA2	eQTLGen	ENSG00000163281	4	-0.316433	0.127806	0.0132904	0.0352374	0.73(0.57 to 0.94)	0.13441	0.778858	20
	IL15	eQTL_BrainMeta	ENSG00000164136	4	-0.255692	0.103438	0.0134382	0.0352374	0.77(0.63 to 0.95)	0.803032	0.932519	12
	KCTD10	eQTLGen	ENSG00000110906	12	-0.0728319	0.0298339	0.0146367	0.0352374	0.93(0.88 to 0.99)	0.646671	0.882911	20
	TMEM200A	eQTLGen	ENSG00000164484	6	0.226128	0.0936153	0.0157136	0.0352374	1.25(1.04 to 1.51)	0.533326	0.848889	20
	DAP	eQTLGen	ENSG00000112977	5	-0.130346	0.0542316	0.0162383	0.0352374	0.88(0.79 to 0.98)	0.454235	0.847906	20
	HFM1	eQTL_BrainMeta	ENSG00000162669	1	0.0885248	0.0375165	0.0182934	0.0352374	1.09(1.02 to 1.18)	0.381385	0.793512	19
	CCNL1	eQTLGen	ENSG00000163660	3	-0.125676	0.0532635	0.0182989	0.0352374	0.88(0.79 to 0.98)	0.422366	0.820538	20
	CCDC3	eQTL_BrainMeta	ENSG00000151468	10	-0.164177	0.0696256	0.0183738	0.0352374	0.85(0.74 to 0.97)	0.353665	0.791648	20
	PRR4	eQTLGen	ENSG00000111215	12	0.0965877	0.0416606	0.0204252	0.037173	1.10(1.02 to 1.20)	0.311376	0.791648	20
	PI3	eQTLGen	ENSG00000124102	20	0.114416	0.0494959	0.0207984	0.037173	1.12(1.02 to 1.24)	0.88313	0.968051	20
	PDCD1LG2	eQTLGen	ENSG00000197646	9	-0.199293	0.0889696	0.0250898	0.0387728	0.82(0.69 to 0.98)	0.194253	0.778858	20
	TMEM50A	eQTLGen	ENSG00000183726	1	-0.0936098	0.0421808	0.0264697	0.0387728	0.91(0.84 to 0.99)	0.0667402	0.778858	20
	ANKRD26	eQTLGen	ENSG00000107890	10	-0.149254	0.0673634	0.0267149	0.0387728	0.86(0.75 to 0.98)	0.651952	0.882911	20
	RCBTB1	eQTL_BrainMeta	ENSG00000136144	13	-0.0545881	0.0247062	0.027141	0.0387728	0.95(0.90 to 0.99)	0.169316	0.778858	20
	FHOD1	eQTLGen	ENSG00000135723	16	0.156982	0.0733055	0.0322351	0.0420862	1.17(1.01 to 1.35)	0.391088	0.793512	20
	CMTR2	eQTLGen	ENSG00000180917	16	0.0864301	0.0405103	0.0328811	0.0420862	1.09(1.01 to 1.18)	0.937948	0.977502	20
	ANAPC4	eQTLGen	ENSG00000053900	4	-0.0753286	0.03536	0.0331444	0.0420862	0.93(0.87 to 0.99)	0.129097	0.778858	20
	PMM1	eQTLGen	ENSG00000100417	22	0.150444	0.0709927	0.0340783	0.0420862	1.16(1.01 to 1.34)	0.0701505	0.778858	20
	HORMAD1	eQTLGen	ENSG00000143452	1	-0.145738	0.0688337	0.0342386	0.0420862	0.86(0.76 to 0.99)	0.207505	0.778858	20
	APBB1IP	eQTLGen	ENSG00000077420	10	-0.159168	0.0751902	0.0342702	0.0420862	0.85(0.74 to 0.99)	0.812624	0.932519	20
	PLXDC2	eQTLGen	ENSG00000120594	10	0.366933	0.175371	0.0364099	0.0431982	1.44(1.02 to 2.04)	0.945874	0.977502	20
	GGPS1	eQTLGen	ENSG00000152904	1	0.142439	0.0703516	0.0429009	0.0467444	1.15(1.00 to 1.32)	0.803764	0.932519	20
	NT5DC2	eQTL_GTEx_Whole_Blood	ENSG00000168268	3	0.154227	0.0767353	0.0444466	0.0471215	1.17(1.00 to 1.36)	0.545714	0.848889	20
	ST6GALNAC1	eQTLGen	ENSG00000070526	17	0.131831	0.0656906	0.0447654	0.0471215	1.14(1.00 to 1.30)	0.244671	0.778858	20
	SLC1A7	eQTL_BrainMeta	ENSG00000162383	1	-0.0402965	0.0201932	0.0459833	0.0480423	0.96(0.92 to 1.00)	0.676025	0.901367	20
	CD274	eQTLGen	ENSG00000120217	9	-0.263675	0.133259	0.0478532	0.0485468	0.77(0.59 to 1.00)	0.614964	0.87852	12
	SETDB1	mQTL_McRae	ENSG00000143379	1	-0.055351	0.0214227	0.00977309	0.0352374	0.95(0.91 to 0.99)	0.771561	0.925334	20
	OAZ2	mQTL_McRae	ENSG00000180304	15	-0.0780249	0.0308491	0.0114308	0.0352374	0.92(0.87 to 0.98)	0.655876	0.882911	20
	C1orf52	mQTL_BrainMeta	ENSG00000162642	1	0.114818	0.0454031	0.0114436	0.0352374	1.12(1.03 to 1.23)	0.322549	0.791648	20
	BAMBI	mQTL_McRae	ENSG00000095739	10	-0.0871234	0.0349404	0.0126497	0.0352374	0.92(0.86 to 0.98)	0.338213	0.791648	20
	KCNA6	mQTL_McRae	ENSG00000151079	12	0.0809099	0.0353853	0.0222225	0.0379409	1.08(1.01 to 1.16)	0.156306	0.778858	20
	GLT8D2	mQTL_McRae	ENSG00000120820	12	0.0804851	0.0354147	0.0230474	0.0379604	1.08(1.01 to 1.16)	0.870622	0.968051	20
	ESPNL	mQTL_McRae	ENSG00000144488	2	-0.0542703	0.0243778	0.0259994	0.0387728	0.95(0.90 to 0.99)	0.302627	0.791648	20
	BAG4	mQTL_BrainMeta	ENSG00000156735	8	-0.0381775	0.0172165	0.0265893	0.0387728	0.96(0.93 to 1.00)	0.482603	0.848889	3
	SPATS2L	mQTL_McRae	ENSG00000196141	2	0.0294357	0.0139748	0.0351742	0.0422225	1.03(1.00 to 1.06)	0.179412	0.778858	20
	NT5DC2	mQTL_McRae	ENSG00000168268	3	-0.0467653	0.0222156	0.0352859	0.0422225	0.95(0.91 to 1.00)	0.237172	0.778858	18
	GAPDHS	mQTL_McRae	ENSG00000105679	19	0.0951414	0.0455878	0.0368887	0.0433985	1.10(1.01 to 1.20)	0.973008	0.98145	20
	SINHCAF	mQTL_BrainMeta	ENSG00000139146	12	0.0696207	0.0338888	0.0399382	0.0455971	1.07(1.00 to 1.15)	0.97444	0.98145	16
	TREX1	mQTL_McRae	ENSG00000213689	3	0.106782	0.0523999	0.0415677	0.0461863	1.11(1.00 to 1.23)	0.256865	0.778858	20
	STK3	mQTL_McRae	ENSG00000104375	8	0.0893302	0.0439309	0.0420094	0.0463096	1.09(1.00 to 1.19)	0.770845	0.925334	20
	SMCO1	mQTL_McRae	ENSG00000214097	3	0.0465281	0.0230909	0.0439047	0.046921	1.05(1.00 to 1.10)	0.904689	0.968051	20
	GIPC2	mQTL_McRae	ENSG00000137960	1	-0.0287964	0.0145161	0.0472829	0.0483183	0.97(0.94 to 1.00)	0.354875	0.791648	20
	ANGPTL3	pQTL_FENLAND	ENSG00000132855	1	-0.213488	0.089896	0.0175568	0.0352374	0.81(0.68 to 0.96)	0.0633257	0.778858	20
	SNX8	pQTL_FENLAND	ENSG00000106266	7	0.316745	0.148535	0.0329691	0.0420862	1.37(1.03 to 1.84)	0.160361	0.778858	7
	MFGE8	pQTL_FENLAND	ENSG00000140545	15	-0.220308	0.0847694	0.00935217	0.0352374	0.80(0.68 to 0.95)	0.352547	0.791648	20
	PSG4	pQTL_FENLAND	ENSG00000243137	19	-0.0846354	0.0345074	0.01418	0.0352374	0.92(0.86 to 0.98)	0.48343	0.848889	20
	PLA2G2A	pQTL_FENLAND	ENSG00000188257	1	-0.0679896	0.030076	0.0237844	0.0387188	0.93(0.88 to 0.99)	0.53157	0.848889	20
	FCN1	pQTL_INTERVAL	ENSG00000085265	9	-0.127645	0.0403067	0.001541	0.0212004	0.88(0.81 to 0.95)	0.59548	0.87852	20
	HGFAC	pQTL_FENLAND	ENSG00000109758	4	-0.0580602	0.0292548	0.0471847	0.0483183	0.94(0.89 to 1.00)	0.693215	0.90701	20
	ECHDC3	sQTL_BrainMeta	ENSG00000134463	10	-0.270681	0.0920613	0.00327975	0.0238597	0.76(0.64 to 0.91)	0.251218	0.778858	20
	MEI1	eQTL_BrainMeta	ENSG00000167077	22	-0.0841266	0.0352536	0.0170175	0.0352374	0.92(0.86 to 0.99)	0.072186	0.778858	20
	PEX6	eQTL_BrainMeta	ENSG00000124587	6	0.0595001	0.0201764	0.00318814	0.0238597	1.06(1.02 to 1.10)	0.106117	0.778858	20
	INIP	eQTLGen	ENSG00000148153	9	0.167868	0.0852167	0.0488505	0.0490519	1.18(1.00 to 1.40)	0.118997	0.778858	20
	CAND2	eQTLGen	ENSG00000144712	3	-0.182863	0.0826136	0.0268647	0.0387728	0.83(0.71 to 0.98)	0.147843	0.778858	20
	BMPR2	eQTLGen	ENSG00000204217	2	-0.173583	0.0783505	0.0267277	0.0387728	0.84(0.72 to 0.98)	0.156083	0.778858	20
	ZFP90	eQTLGen	ENSG00000184939	16	0.0848939	0.0339193	0.0123208	0.0352374	1.09(1.02 to 1.16)	0.185708	0.778858	20
	RPL37A	eQTLGen	ENSG00000197756	2	-0.407443	0.16736	0.0149111	0.0352374	0.67(0.48 to 0.92)	0.196053	0.778858	20
	DOCK7	eQTLGen	ENSG00000116641	1	-0.229765	0.0988132	0.0200587	0.037173	0.79(0.65 to 0.96)	0.2066	0.778858	20
	LHFPL2	eQTLGen	ENSG00000145685	5	0.359311	0.142044	0.0114201	0.0352374	1.43(1.08 to 1.89)	0.215853	0.778858	20
	NCAPD2	eQTLGen	ENSG00000010292	12	-0.101933	0.0504674	0.0434055	0.0467444	0.90(0.82 to 1.00)	0.222375	0.778858	20
	STK11	eQTLGen	ENSG00000118046	19	-0.179953	0.0781159	0.0212417	0.037173	0.84(0.72 to 0.97)	0.235268	0.778858	20
	CD1E	eQTLGen	ENSG00000158488	1	-0.29872	0.0864833	0.000552185	0.0193265	0.74(0.63 to 0.88)	0.245332	0.778858	20
	COL23A1	eQTLGen	ENSG00000050767	5	-0.22958	0.0996067	0.0211741	0.037173	0.79(0.65 to 0.97)	0.247845	0.778858	20
	SRGAP2C	eQTLGen	ENSG00000171943	1	-0.080538	0.0369461	0.0292664	0.0401695	0.92(0.86 to 0.99)	0.268727	0.778858	11
	ANGEL2	eQTLGen	ENSG00000174606	1	0.133546	0.0650452	0.0400603	0.0455971	1.14(1.01 to 1.30)	0.271415	0.778858	20
	SESN1	eQTLGen	ENSG00000080546	6	-0.118365	0.0519957	0.0228204	0.0379604	0.89(0.80 to 0.98)	0.294769	0.791648	20
	ZNF91	eQTLGen	ENSG00000167232	19	0.138565	0.0580934	0.0170689	0.0352374	1.15(1.03 to 1.29)	0.305845	0.791648	20
	IQCE	eQTLGen	ENSG00000106012	7	-0.55977	0.184572	0.0024229	0.0212004	0.57(0.40 to 0.82)	0.319216	0.791648	20
	TIGAR	eQTL_BrainMeta	ENSG00000078237	12	0.0923069	0.0388171	0.017407	0.0352374	1.10(1.02 to 1.18)	0.361896	0.791648	20
	SLC18A2	eQTLGen	ENSG00000165646	10	0.249607	0.117329	0.0333856	0.0420862	1.28(1.02 to 1.62)	0.385059	0.793512	20
	ARL6IP5	eQTLGen	ENSG00000144746	3	0.350146	0.145921	0.0164152	0.0352374	1.42(1.07 to 1.89)	0.385526	0.793512	20
	CCDC25	eQTL_BrainMeta	ENSG00000147419	8	-0.0751272	0.0324816	0.0207273	0.037173	0.93(0.87 to 0.99)	0.404775	0.80955	20
	UHMK1	eQTLGen	ENSG00000152332	1	-0.235783	0.0971474	0.0152217	0.0352374	0.79(0.65 to 0.96)	0.415337	0.818974	20
	TEF	eQTLGen	ENSG00000167074	22	-0.145076	0.0486407	0.00285796	0.0235362	0.86(0.79 to 0.95)	0.427852	0.820538	20
	APOBEC3D	eQTLGen	ENSG00000243811	22	-0.171233	0.0724174	0.0180528	0.0352374	0.84(0.73 to 0.97)	0.446775	0.84525	20
	TRPM6	eQTLGen	ENSG00000119121	9	0.144283	0.0563121	0.0104008	0.0352374	1.16(1.03 to 1.29)	0.46648	0.848889	20
	MFGE8	eQTLGen	ENSG00000140545	15	-0.139221	0.0516677	0.00704841	0.0352374	0.87(0.79 to 0.96)	0.518646	0.848889	20
	LSM8	eQTLGen	ENSG00000128534	7	-0.146061	0.0596735	0.0143786	0.0352374	0.86(0.77 to 0.97)	0.531872	0.848889	15
	INTS1	eQTLGen	ENSG00000164880	7	0.13797	0.0547692	0.0117649	0.0352374	1.15(1.03 to 1.28)	0.540732	0.848889	20
	ZNF329	eQTLGen	ENSG00000181894	19	-0.208265	0.0878156	0.0177104	0.0352374	0.81(0.68 to 0.96)	0.563936	0.858163	20
	LRRN1	eQTLGen	ENSG00000175928	3	-0.276467	0.10166	0.00653787	0.0339	0.76(0.62 to 0.93)	0.641406	0.882911	20
	RBBP8	eQTLGen	ENSG00000101773	18	-0.131235	0.0572753	0.0219457	0.0379308	0.88(0.78 to 0.98)	0.684841	0.904507	20
	INTS5	eQTLGen	ENSG00000185085	11	-0.216194	0.0522993	3.56835e-05	0.00499569	0.81(0.73 to 0.89)	0.702863	0.911119	20
	SUSD1	eQTLGen	ENSG00000106868	9	-0.0807855	0.0321843	0.0120701	0.0352374	0.92(0.87 to 0.98)	0.721614	0.923846	20
	OCEL1	eQTLGen	ENSG00000099330	19	0.201092	0.0760178	0.00816107	0.0352374	1.22(1.05 to 1.42)	0.739217	0.925334	20
	ARHGAP5	eQTLGen	ENSG00000100852	14	0.349387	0.113224	0.00203	0.0212004	1.42(1.14 to 1.77)	0.7519	0.925334	20
	PHC1	eQTLGen	ENSG00000111752	12	0.243789	0.100493	0.0152692	0.0352374	1.28(1.05 to 1.55)	0.757577	0.925334	20
	TUB	eQTLGen	ENSG00000166402	11	0.586416	0.277917	0.0348552	0.0422225	1.80(1.04 to 3.10)	0.878399	0.968051	20
	THRA	eQTLGen	ENSG00000126351	17	0.134381	0.0648787	0.0383345	0.0443539	1.14(1.01 to 1.30)	0.900213	0.968051	20
	TBK1	eQTLGen	ENSG00000183735	12	0.193934	0.0876116	0.0268587	0.0387728	1.21(1.02 to 1.44)	0.937738	0.977502	20
	RNF10	eQTLGen	ENSG00000022840	12	-0.224108	0.0803306	0.00527369	0.0307632	0.80(0.68 to 0.94)	0.949573	0.977502	20
	GRAMD1A	eQTLGen	ENSG00000089351	19	-0.148125	0.0678391	0.029001	0.0401695	0.86(0.75 to 0.98)	0.962021	0.98145	20
	RAB11FIP3	mQTL_McRae	ENSG00000090565	16	-0.0508914	0.0239347	0.0334816	0.0420862	0.95(0.91 to 1.00)	0.118639	0.778858	20
	VWDE	mQTL_McRae	ENSG00000146530	7	-0.053737	0.0227597	0.0182228	0.0352374	0.95(0.91 to 0.99)	0.161056	0.778858	20
	SH2D7	mQTL_McRae	ENSG00000183476	15	0.0795386	0.0389839	0.041321	0.0461863	1.08(1.00 to 1.17)	0.168216	0.778858	10
	WDR6	mQTL_McRae	ENSG00000178252	3	-0.0874085	0.0444117	0.0490519	0.0490519	0.92(0.84 to 1.00)	0.186817	0.778858	20
	PKDCC	mQTL_McRae	ENSG00000162878	2	0.149793	0.0720714	0.0376735	0.0439524	1.16(1.01 to 1.34)	0.195625	0.778858	20
	UXS1	mQTL_BrainMeta	ENSG00000115652	2	-0.0433991	0.0197921	0.028325	0.0400556	0.96(0.92 to 1.00)	0.236047	0.778858	20
	HLCS	mQTL_McRae	ENSG00000159267	21	0.0416467	0.0150569	0.00567555	0.0317831	1.04(1.01 to 1.07)	0.277631	0.778858	19
	ANKLE2	mQTL_McRae	ENSG00000176915	12	0.0586987	0.0261471	0.0247719	0.0387728	1.06(1.01 to 1.12)	0.278164	0.778858	20
	TRMT61A	mQTL_McRae	ENSG00000166166	14	0.0695617	0.0244532	0.00444549	0.0282895	1.07(1.02 to 1.12)	0.34285	0.791648	20
	TMPRSS6	mQTL_McRae	ENSG00000187045	22	0.0632814	0.0313171	0.0433146	0.0467444	1.07(1.00 to 1.13)	0.376491	0.793512	20
	WT1	mQTL_BrainMeta	ENSG00000184937	11	0.0444968	0.0223835	0.0468196	0.0483183	1.05(1.00 to 1.09)	0.502539	0.848889	20
	SPTBN5	mQTL_BrainMeta	ENSG00000137877	15	0.202755	0.0992216	0.0410074	0.0461863	1.22(1.01 to 1.49)	0.534809	0.848889	12
	USP33	mQTL_McRae	ENSG00000077254	1	0.0619541	0.0272401	0.0229438	0.0379604	1.06(1.01 to 1.12)	0.537274	0.848889	20
	FCN1	mQTL_McRae	ENSG00000085265	9	0.211561	0.0693455	0.0022821	0.0212004	1.24(1.08 to 1.42)	0.556676	0.856425	20
	PDE1C	mQTL_McRae	ENSG00000154678	7	0.0556171	0.0226957	0.0142633	0.0352374	1.06(1.01 to 1.11)	0.614829	0.87852	20
	HAX1	mQTL_McRae	ENSG00000143575	1	-0.037073	0.0173571	0.0326873	0.0420862	0.96(0.93 to 1.00)	0.631061	0.882911	20
	DEFA4	mQTL_McRae	ENSG00000164821	8	0.103574	0.0444166	0.0197068	0.037173	1.11(1.02 to 1.21)	0.74087	0.925334	18
	TAPT1	mQTL_McRae	ENSG00000169762	4	0.0735463	0.0286305	0.0102049	0.0352374	1.08(1.02 to 1.14)	0.810823	0.932519	20
	PDXP	mQTL_McRae	ENSG00000241360	22	0.0479446	0.0222536	0.0312036	0.0420862	1.05(1.00 to 1.10)	0.900063	0.968051	20
	PARD3	mQTL_BrainMeta	ENSG00000148498	10	0.0795918	0.0370904	0.0318821	0.0420862	1.08(1.01 to 1.16)	0.905819	0.968051	20
	SIX5	mQTL_McRae	ENSG00000177045	19	-0.0400904	0.0183356	0.0287804	0.0401695	0.96(0.93 to 1.00)	0.984562	0.984562	20
	* Only presented the association with P value after FDR adjustment < 0.05 and P for HEIDI test >0.05
	CI, confidence interval; FDR, false dicovery rate; HEIDI, heterogeneity in dependent instruments; SNP, single nucleotide polymorphsim; OR odds ratio

## Sheet: Table S5
	Table S5. multi-variant Mendelian randomization analysis for eQTL, mQTL, sQTL, pQTL and AD in discovery stage
	qtl_name	gene_name	method	bxy	se	pval	nsnps	FDR	OR(95%CI)
	sQTL_BrainMeta	RASA4B	MR-IVW	0.0418351	0.01851	0.0238125	3	0.0496351	1.04(1.01 to 1.08)
	sQTL_BrainMeta	RASA4B	GSMR	0.0416336	0.0186497	0.0255883	3	0.0514222	1.04(1.01 to 1.08)
	sQTL_BrainMeta	RASA4B	MR-Egger	0.0684822	0.0678733	0.312989	3	0.346446	1.07(0.94 to 1.22)
	pQTL_FENLAND	ALPP	MR-IVW	0.119477	0.0337434	0.000398983	9	0.00683821	1.13(1.05 to 1.20)
	pQTL_FENLAND	ALPP	GSMR	0.118819	0.0340005	0.000474717	9	0.00761921	1.13(1.05 to 1.20)
	pQTL_FENLAND	FAM20A	MR-IVW	0.265906	0.0849145	0.00173943	4	0.0155099	1.30(1.10 to 1.54)
	pQTL_FENLAND	FAM20A	GSMR	0.266076	0.0880444	0.00251055	4	0.0183196	1.30(1.10 to 1.55)
	pQTL_FENLAND	TNFSF13B	MR-IVW	0.343835	0.114536	0.0026823	3	0.0183196	1.41(1.13 to 1.77)
	pQTL_FENLAND	TNFSF13B	GSMR	0.336591	0.119165	0.00473424	3	0.0262016	1.40(1.11 to 1.77)
	pQTL_FENLAND	HDHD2	MR-IVW	0.144093	0.0525998	0.00615475	3	0.0300285	1.15(1.04 to 1.28)
	pQTL_FENLAND	CD5L	GSMR	0.0869796	0.031763	0.00617409	13	0.0300285	1.09(1.03 to 1.16)
	pQTL_FENLAND	HDHD2	GSMR	0.144097	0.0531287	0.00668345	3	0.0311896	1.15(1.04 to 1.28)
	pQTL_FENLAND	HEXIM2	MR-IVW	-0.196208	0.0738027	0.0078477	5	0.0335925	0.82(0.71 to 0.95)
	pQTL_FENLAND	CD33	GSMR	0.0531314	0.0202357	0.00864895	13	0.0342645	1.05(1.01 to 1.10)
	pQTL_FENLAND	HEXIM2	GSMR	-0.192878	0.0753692	0.0104939	5	0.0361461	0.82(0.71 to 0.96)
	pQTL_FENLAND	BPHL	MR-IVW	-0.0739322	0.0300514	0.0138864	5	0.0405681	0.93(0.88 to 0.99)
	pQTL_FENLAND	TAGLN	MR-IVW	0.252771	0.102897	0.0140282	3	0.0405681	1.29(1.05 to 1.58)
	pQTL_FENLAND	BPHL	GSMR	-0.0734537	0.0301779	0.0149321	5	0.0407732	0.93(0.88 to 0.99)
	pQTL_FENLAND	RNASE4	MR-IVW	-0.0866891	0.0356848	0.0151279	7	0.0408071	0.92(0.86 to 0.98)
	pQTL_FENLAND	CD5L	MR-IVW	0.0867285	0.0358345	0.0155097	13	0.0414884	1.09(1.02 to 1.17)
	pQTL_FENLAND	RNASE4	GSMR	-0.0861881	0.03587	0.0162706	7	0.0422367	0.92(0.86 to 0.98)
	pQTL_FENLAND	HTRA1	MR-IVW	-0.207436	0.0870851	0.0172195	3	0.0435362	0.81(0.69 to 0.96)
	pQTL_FENLAND	HTRA1	GSMR	-0.206071	0.0884578	0.0198275	3	0.0471384	0.81(0.68 to 0.97)
	pQTL_FENLAND	TAGLN	GSMR	0.24514	0.107222	0.0222381	3	0.04843	1.28(1.04 to 1.58)
	pQTL_FENLAND	CD33	MR-IVW	0.0606131	0.0300224	0.0434945	13	0.0634624	1.06(1.00 to 1.13)
	pQTL_FENLAND	TAGLN	MR-Egger	1.02882	0.3662	0.00496254	3	0.0269996	2.80(1.36 to 5.73)
	pQTL_FENLAND	TNFSF13B	MR-Egger	0.0895	0.496286	0.856886	3	0.867698	1.09(0.41 to 2.89)
	pQTL_FENLAND	CD5L	MR-Egger	0.177174	0.0557437	0.00148106	13	0.0144067	1.19(1.07 to 1.33)
	pQTL_FENLAND	RNASE4	MR-Egger	-0.0171372	0.0984358	0.86179	7	0.86992	0.98(0.81 to 1.19)
	pQTL_FENLAND	FAM20A	MR-Egger	0.246988	0.191747	0.197714	4	0.235061	1.28(0.88 to 1.86)
	pQTL_FENLAND	HDHD2	MR-Egger	0.133554	0.0862078	0.12133	3	0.157044	1.14(0.97 to 1.35)
	pQTL_FENLAND	HEXIM2	MR-Egger	-0.288228	0.23814	0.226153	5	0.263791	0.75(0.47 to 1.20)
	pQTL_FENLAND	BPHL	MR-Egger	-0.0669238	0.059932	0.264139	5	0.296464	0.94(0.83 to 1.05)
	pQTL_FENLAND	CD33	MR-Egger	0.063265	0.0488766	0.195534	13	0.233332	1.07(0.97 to 1.17)
	pQTL_FENLAND	HTRA1	MR-Egger	-0.40954	0.29039	0.158448	3	0.197139	0.66(0.38 to 1.17)
	pQTL_FENLAND	ALPP	MR-Egger	0.132354	0.0637235	0.0378011	9	0.0609061	1.14(1.01 to 1.29)
	eQTLGen	ZNF205	MR-IVW	-0.195918	0.0420266	3.13518e-06	5	0.000654033	0.82(0.76 to 0.89)
	eQTLGen	ZNF205	GSMR	-0.195055	0.0424993	4.44102e-06	5	0.000654033	0.82(0.76 to 0.89)
	eQTLGen	TNK2	MR-Egger	0.647652	0.38027	0.0885428	3	0.116964	1.91(0.91 to 4.03)
	eQTLGen	PTPN12	GSMR	0.143431	0.0324024	9.57574e-06	13	0.000768453	1.15(1.08 to 1.23)
	eQTLGen	STAG3	MR-Egger	-0.0904394	0.0866623	0.296678	15	0.329528	0.91(0.77 to 1.08)
	eQTLGen	PTPN12	MR-IVW	0.14437	0.0346165	3.03849e-05	13	0.00161582	1.16(1.08 to 1.24)
	eQTLGen	COMMD10	GSMR	0.166123	0.0418956	7.33432e-05	12	0.00261591	1.18(1.09 to 1.28)
	eQTLGen	TBK1	MR-IVW	0.227078	0.0582744	9.75122e-05	3	0.00313014	1.25(1.12 to 1.41)
	eQTLGen	TBK1	GSMR	0.226488	0.0587064	0.000114328	3	0.0033363	1.25(1.12 to 1.41)
	eQTLGen	THRA	GSMR	-0.155967	0.0420857	0.000210619	6	0.00520067	0.86(0.79 to 0.93)
	eQTLGen	MYO1F	MR-IVW	0.372984	0.108783	0.000606486	3	0.00884918	1.45(1.17 to 1.80)
	eQTLGen	FAM118B	GSMR	-0.123089	0.0370171	0.000883618	10	0.0109603	0.88(0.82 to 0.95)
	eQTLGen	MYO1F	GSMR	0.36956	0.111218	0.00089109	3	0.0109603	1.45(1.16 to 1.80)
	eQTLGen	SMARCD2	MR-Egger	0.251866	0.0959828	0.00868844	3	0.0342645	1.29(1.07 to 1.55)
	eQTL_BrainMeta	ARL17B	GSMR	-0.0474033	0.0147246	0.00128494	7	0.0139405	0.95(0.93 to 0.98)
	eQTLGen	CCDC82	MR-IVW	-0.138848	0.0432806	0.00133623	8	0.0139405	0.87(0.80 to 0.95)
	eQTLGen	FAM118B	MR-IVW	-0.123331	0.0384698	0.00134628	10	0.0139405	0.88(0.82 to 0.95)
	eQTLGen	CCDC82	GSMR	-0.138415	0.0434131	0.00143103	8	0.0143551	0.87(0.80 to 0.95)
	eQTLGen	SYTL2	GSMR	-0.104155	0.0330501	0.0016247	17	0.0153391	0.90(0.84 to 0.96)
	eQTLGen	ABHD17C	GSMR	0.0924661	0.0299829	0.00204266	14	0.0169031	1.10(1.03 to 1.16)
	eQTLGen	NAA60	MR-IVW	-0.159188	0.0516448	0.00205365	3	0.0169031	0.85(0.77 to 0.94)
	eQTLGen	NAA60	GSMR	-0.158875	0.0518819	0.00219691	3	0.0176302	0.85(0.77 to 0.94)
	eQTL_BrainMeta	SLC66A2	MR-IVW	0.114114	0.0376611	0.00244542	3	0.0183196	1.12(1.04 to 1.21)
	eQTL_BrainMeta	ARL17B	MR-IVW	-0.0472084	0.0156162	0.00250252	7	0.0183196	0.95(0.93 to 0.98)
	eQTLGen	MAU2	MR-IVW	-0.0753251	0.0249267	0.00251226	21	0.0183196	0.93(0.88 to 0.97)
	eQTLGen	MAU2	GSMR	-0.0750994	0.024995	0.00265947	21	0.0183196	0.93(0.88 to 0.97)
	eQTLGen	THRA	MR-IVW	-0.159913	0.0532375	0.00266655	6	0.0183196	0.85(0.77 to 0.95)
	eQTLGen	NIP7	GSMR	0.159954	0.053487	0.00278501	6	0.0183699	1.17(1.06 to 1.30)
	eQTL_BrainMeta	SLC66A2	GSMR	0.11194	0.0388315	0.00394259	3	0.0225995	1.12(1.04 to 1.21)
	eQTLGen	TNK2	MR-IVW	0.37368	0.13183	0.00458893	3	0.0258429	1.45(1.12 to 1.88)
	eQTL_GTEx_Whole_Blood	MYBPC3	MR-IVW	0.146783	0.0525272	0.00519938	3	0.0278167	1.16(1.04 to 1.28)
	eQTLGen	ELMO1	MR-IVW	-0.0828718	0.0298123	0.00543938	13	0.0286236	0.92(0.87 to 0.98)
	eQTLGen	EPHB4	GSMR	0.0710458	0.0256541	0.00561637	24	0.0287081	1.07(1.02 to 1.13)
	eQTLGen	ELMO1	GSMR	-0.0825276	0.0298667	0.00572373	13	0.0287081	0.92(0.87 to 0.98)
	eQTLGen	GRAMD1B	MR-IVW	-0.136295	0.0500545	0.00647058	5	0.0310008	0.87(0.79 to 0.96)
	eQTLGen	GRAMD1B	GSMR	-0.136122	0.0502074	0.0067043	5	0.0311896	0.87(0.79 to 0.96)
	eQTLGen	ABHD17C	MR-Egger	0.104696	0.0718271	0.144949	14	0.182778	1.11(0.96 to 1.28)
	eQTL_GTEx_Whole_Blood	MYBPC3	GSMR	0.144387	0.053451	0.00690689	3	0.031673	1.16(1.04 to 1.28)
	eQTLGen	TNK2	GSMR	0.363646	0.135068	0.00709548	3	0.0320796	1.44(1.10 to 1.87)
	eQTLGen	EPHB4	MR-IVW	0.0717589	0.0269142	0.00767108	24	0.0335925	1.07(1.02 to 1.13)
	eQTLGen	ABHD17C	MR-IVW	0.09466	0.0355275	0.00771217	14	0.0335925	1.10(1.03 to 1.18)
	eQTLGen	COMMD10	MR-IVW	0.167657	0.0633205	0.00810278	12	0.03372	1.18(1.04 to 1.34)
	eQTLGen	BASP1	MR-IVW	0.138852	0.0525162	0.00819365	8	0.03372	1.15(1.04 to 1.27)
	eQTLGen	SYTL2	MR-IVW	-0.105996	0.040193	0.00835998	17	0.033969	0.90(0.83 to 0.97)
	eQTLGen	INVS	GSMR	-0.129491	0.0497063	0.00918429	9	0.0342645	0.88(0.80 to 0.97)
	eQTLGen	BASP1	GSMR	0.137362	0.0528355	0.00932785	8	0.0342645	1.15(1.03 to 1.27)
	eQTLGen	MERTK	MR-IVW	-0.0594713	0.0229293	0.00949546	16	0.0342645	0.94(0.90 to 0.99)
	eQTLGen	CHD7	MR-IVW	-0.183802	0.07087	0.00950012	3	0.0342645	0.83(0.72 to 0.96)
	eQTLGen	CHD7	GSMR	-0.183703	0.0713624	0.0100463	3	0.0358319	0.83(0.72 to 0.96)
	eQTLGen	INPP5D	MR-IVW	0.163045	0.0635298	0.0102752	5	0.0361461	1.18(1.04 to 1.33)
	eQTLGen	CCDC82	MR-Egger	-0.0916258	0.0676144	0.175378	8	0.214055	0.91(0.80 to 1.04)
	eQTLGen	MERTK	GSMR	-0.0584701	0.0229888	0.0109774	16	0.0361461	0.94(0.90 to 0.99)
	eQTLGen	INPP5D	GSMR	0.162289	0.0638444	0.0110235	5	0.0361461	1.18(1.04 to 1.33)
	eQTLGen	ZNF330	MR-IVW	-0.17807	0.0701276	0.0111098	3	0.0361461	0.84(0.73 to 0.96)
	eQTLGen	NIP7	MR-IVW	0.158994	0.0626447	0.0111479	6	0.0361461	1.17(1.04 to 1.33)
	eQTLGen	ZNF330	GSMR	-0.177512	0.0704161	0.0117055	3	0.0372026	0.84(0.73 to 0.96)
	eQTLGen	TTC38	MR-IVW	0.0946709	0.0379471	0.0126024	6	0.0393213	1.10(1.02 to 1.18)
	eQTLGen	TTC38	GSMR	0.0943013	0.038017	0.0131196	6	0.0401085	1.10(1.02 to 1.18)
	eQTLGen	NEBL	MR-IVW	0.054901	0.0221813	0.0133198	18	0.0403365	1.06(1.01 to 1.10)
	eQTLGen	NEBL	GSMR	0.0547828	0.0222249	0.0137039	18	0.0405681	1.06(1.01 to 1.10)
	eQTLGen	RAPGEF3	MR-IVW	0.135349	0.0550426	0.0139327	6	0.0405681	1.14(1.03 to 1.28)
	eQTLGen	RNF112	MR-IVW	0.136356	0.0557909	0.0145235	3	0.0407732	1.15(1.03 to 1.28)
	eQTLGen	RAPGEF3	GSMR	0.134889	0.0552436	0.0146178	6	0.0407732	1.14(1.03 to 1.28)
	eQTL_BrainMeta	CAPSL	MR-IVW	0.0982045	0.0403404	0.0149168	3	0.0407732	1.10(1.02 to 1.19)
	eQTLGen	RNF112	GSMR	0.13622	0.0559631	0.0149285	3	0.0407732	1.15(1.03 to 1.28)
	eQTLGen	OSBPL3	GSMR	0.103828	0.0434534	0.0168753	10	0.0433357	1.11(1.02 to 1.21)
	eQTLGen	PRPSAP1	MR-IVW	-0.213652	0.0905506	0.0183009	3	0.0451892	0.81(0.68 to 0.96)
	eQTLGen	TADA3	MR-Egger	0.0893629	0.0756917	0.237755	9	0.271599	1.09(0.94 to 1.27)
	eQTLGen	CHD7	MR-Egger	-0.395158	0.142969	0.00571066	3	0.0287081	0.67(0.51 to 0.89)
	eQTL_BrainMeta	LRRC37A	MR-IVW	-0.0529535	0.0225951	0.0190996	4	0.0468013	0.95(0.91 to 0.99)
	eQTL_BrainMeta	LRRC37A	GSMR	-0.0530134	0.022692	0.0194799	4	0.0471384	0.95(0.91 to 0.99)
	eQTL_BrainMeta	CAPSL	GSMR	0.0962263	0.0412845	0.0197633	3	0.0471384	1.10(1.02 to 1.19)
	eQTLGen	HPS6	MR-IVW	-0.106649	0.0458668	0.0200621	4	0.0471384	0.90(0.82 to 0.98)
	eQTLGen	INVS	MR-IVW	-0.128828	0.0554124	0.0200778	9	0.0471384	0.88(0.79 to 0.98)
	eQTLGen	SF3A1	GSMR	-0.089597	0.0385871	0.0202361	11	0.0471384	0.91(0.85 to 0.99)
	eQTLGen	PRPSAP1	GSMR	-0.211631	0.0913399	0.0205057	3	0.0471384	0.81(0.68 to 0.97)
	eQTLGen	HPS6	GSMR	-0.106568	0.0461276	0.0208719	4	0.0475169	0.90(0.82 to 0.98)
	eQTLGen	PITPNA	MR-IVW	0.107728	0.0472246	0.0225373	6	0.04843	1.11(1.02 to 1.22)
	eQTLGen	PITPNA	GSMR	0.107749	0.0473398	0.022842	6	0.04843	1.11(1.02 to 1.22)
	eQTLGen	SMARCD2	MR-IVW	0.124739	0.0548105	0.0228565	3	0.04843	1.13(1.02 to 1.26)
	eQTLGen	SMARCD2	GSMR	0.124914	0.0549785	0.0230834	3	0.04843	1.13(1.02 to 1.26)
	eQTL_BrainMeta	CDK10	MR-IVW	0.039002	0.0172983	0.0241538	3	0.0500218	1.04(1.01 to 1.08)
	eQTLGen	TADA3	GSMR	0.0979141	0.0437431	0.0251956	9	0.0514222	1.10(1.01 to 1.20)
	eQTLGen	PYGB	MR-IVW	-0.0458489	0.0205083	0.0253764	31	0.0514222	0.96(0.92 to 0.99)
	eQTLGen	OSBPL3	MR-IVW	0.105105	0.0470952	0.025631	10	0.0514222	1.11(1.01 to 1.22)
	eQTLGen	PYGB	GSMR	-0.0457144	0.0205447	0.0260736	31	0.0519852	0.96(0.92 to 0.99)
	eQTLGen	TADA3	MR-IVW	0.0988947	0.0447563	0.0271312	9	0.0534301	1.10(1.01 to 1.21)
	eQTL_BrainMeta	CDK10	GSMR	0.0384412	0.0174465	0.0275678	3	0.0536318	1.04(1.00 to 1.08)
	eQTLGen	GTF2A2	MR-IVW	-0.0964839	0.0438827	0.0279009	3	0.053953	0.91(0.83 to 0.99)
	eQTLGen	INIP	MR-IVW	-0.117007	0.0533013	0.0281494	3	0.0540674	0.89(0.80 to 0.99)
	eQTLGen	INIP	GSMR	-0.117022	0.0534334	0.0285204	3	0.0540674	0.89(0.80 to 0.99)
	eQTL_BrainMeta	NME5	MR-IVW	0.0490163	0.0224174	0.0287767	3	0.0540674	1.05(1.01 to 1.10)
	eQTLGen	TPK1	MR-IVW	0.0860069	0.0393411	0.0288023	10	0.0540674	1.09(1.01 to 1.18)
	eQTLGen	STAG3	GSMR	-0.0763827	0.035003	0.0290966	15	0.0543023	0.93(0.87 to 0.99)
	eQTL_BrainMeta	NME5	GSMR	0.0489303	0.0226108	0.0304627	3	0.0561985	1.05(1.00 to 1.10)
	eQTLGen	TPK1	GSMR	0.0850686	0.0394571	0.0310856	10	0.0570198	1.09(1.01 to 1.18)
	eQTLGen	GTF2A2	GSMR	-0.0947814	0.0440763	0.0315241	3	0.0574957	0.91(0.83 to 0.99)
	eQTLGen	HECTD3	MR-IVW	-0.272148	0.126943	0.0320441	3	0.0576012	0.76(0.59 to 0.98)
	eQTLGen	BDH2	GSMR	0.0676987	0.0316457	0.0324139	9	0.0578047	1.07(1.01 to 1.14)
	eQTLGen	SPCS3	MR-IVW	-0.175212	0.0821155	0.0328655	3	0.057869	0.84(0.71 to 0.99)
	eQTLGen	ZNF23	MR-IVW	-0.127805	0.0599405	0.0329908	6	0.057869	0.88(0.78 to 0.99)
	eQTLGen	ZNF23	GSMR	-0.127821	0.0601057	0.033453	6	0.0581081	0.88(0.78 to 0.99)
	eQTLGen	MYO1C	MR-IVW	-0.294873	0.138687	0.0334891	3	0.0581081	0.74(0.57 to 0.98)
	eQTLGen	EIF3D	MR-IVW	0.188921	0.0890935	0.0339653	3	0.0586175	1.21(1.01 to 1.44)
	eQTLGen	OSER1	GSMR	-0.0727807	0.0343793	0.0342607	11	0.0588112	0.93(0.87 to 0.99)
	eQTLGen	SPCS3	GSMR	-0.173947	0.0827693	0.0355896	3	0.0601277	0.84(0.71 to 0.99)
	eQTLGen	MSRB2	MR-IVW	0.0645943	0.0308699	0.0363963	15	0.0609061	1.07(1.00 to 1.13)
	eQTLGen	STAG3	MR-IVW	-0.0779869	0.0373203	0.036648	15	0.0609061	0.92(0.86 to 1.00)
	eQTLGen	HECTD3	GSMR	-0.26902	0.128901	0.0368853	3	0.0609061	0.76(0.59 to 0.98)
	eQTL_BrainMeta	RPL9	MR-IVW	-0.0286736	0.0137723	0.0373448	3	0.0609061	0.97(0.95 to 1.00)
	eQTLGen	MSRB2	GSMR	0.0642054	0.0309224	0.0378627	15	0.0609061	1.07(1.00 to 1.13)
	eQTLGen	OSER1	MR-IVW	-0.0739963	0.0356478	0.0379161	11	0.0609061	0.93(0.87 to 1.00)
	eQTL_BrainMeta	RPL9	GSMR	-0.028568	0.0138265	0.0388122	3	0.0619836	0.97(0.95 to 1.00)
	eQTLGen	EIF3D	GSMR	0.185375	0.0898168	0.0390249	3	0.0620148	1.20(1.01 to 1.44)
	eQTLGen	SLC15A4	MR-IVW	-0.150564	0.0731876	0.0396634	3	0.0624116	0.86(0.75 to 0.99)
	eQTLGen	SLC15A4	GSMR	-0.150643	0.0735262	0.0404783	3	0.0627707	0.86(0.74 to 0.99)
	eQTL_BrainMeta	RASA4B	MR-IVW	-0.0346953	0.0170255	0.0415653	3	0.0634624	0.97(0.93 to 1.00)
	eQTLGen	HDHD2	MR-IVW	0.0863067	0.0424226	0.0419062	3	0.0634624	1.09(1.00 to 1.18)
	eQTLGen	OSBPL3	MR-Egger	0.191275	0.114075	0.0935917	10	0.123127	1.21(0.97 to 1.51)
	eQTLGen	HDHD2	GSMR	0.0862658	0.0425215	0.042483	3	0.0634624	1.09(1.00 to 1.18)
	eQTL_BrainMeta	RASA4B	GSMR	-0.0346615	0.0170945	0.0425973	3	0.0634624	0.97(0.93 to 1.00)
	eQTLGen	TTC38	MR-Egger	0.0525794	0.0642062	0.412835	6	0.444698	1.05(0.93 to 1.20)
	eQTLGen	MYO1C	GSMR	-0.285316	0.140809	0.0427372	3	0.0634624	0.75(0.57 to 0.99)
	eQTLGen	BDH2	MR-IVW	0.0679891	0.0336436	0.0432939	9	0.0634624	1.07(1.00 to 1.14)
	eQTLGen	NQO2	MR-IVW	-0.0454421	0.0224992	0.0434126	20	0.0634624	0.96(0.91 to 1.00)
	eQTLGen	SF3A1	MR-IVW	-0.089282	0.0444578	0.0446178	11	0.064515	0.91(0.84 to 1.00)
	eQTLGen	SF3A1	MR-Egger	-0.118297	0.0796071	0.137276	11	0.174864	0.89(0.76 to 1.04)
	eQTLGen	NQO2	GSMR	-0.0451179	0.0225441	0.0453581	20	0.0652913	0.96(0.91 to 1.00)
	eQTLGen	AP2S1	MR-IVW	0.203282	0.102112	0.0465059	3	0.0660549	1.23(1.00 to 1.50)
	eQTLGen	AP2S1	GSMR	0.205684	0.103466	0.0468191	3	0.0660939	1.23(1.00 to 1.50)
	eQTL_BrainMeta	CCDC25	MR-IVW	-0.044057	0.0223126	0.0483215	3	0.06744	0.96(0.92 to 1.00)
	eQTL_BrainMeta	CCDC25	GSMR	-0.0440305	0.0224168	0.0495093	3	0.0687986	0.96(0.92 to 1.00)
	eQTLGen	ZNF330	MR-Egger	-0.0292546	0.188818	0.876872	3	0.88237	0.97(0.67 to 1.41)
	eQTLGen	ZNF205	MR-Egger	-0.11528	0.0990916	0.244681	5	0.278431	0.89(0.73 to 1.08)
	eQTLGen	THRA	MR-Egger	-0.00709596	0.079955	0.929281	6	0.932185	0.99(0.85 to 1.16)
	eQTLGen	RNF112	MR-Egger	0.161648	0.0905561	0.0742521	3	0.100147	1.18(0.98 to 1.40)
	eQTLGen	MYO1F	MR-Egger	0.646631	0.190304	0.000679082	3	0.00947762	1.91(1.31 to 2.77)
	eQTLGen	MSRB2	MR-Egger	0.0392422	0.0475993	0.409697	15	0.442803	1.04(0.95 to 1.14)
	eQTLGen	ELMO1	MR-Egger	-0.105032	0.0542807	0.0529922	13	0.0733211	0.90(0.81 to 1.00)
	eQTLGen	INPP5D	MR-Egger	0.210051	0.174958	0.229913	5	0.265475	1.23(0.88 to 1.74)
	eQTLGen	MYO1C	MR-Egger	-1.10938	1.10833	0.316853	3	0.349518	0.33(0.04 to 2.89)
	eQTLGen	RAPGEF3	MR-Egger	0.112883	0.0856335	0.187435	6	0.225343	1.12(0.95 to 1.32)
	eQTLGen	EIF3D	MR-Egger	-0.18452	0.217796	0.396876	3	0.430396	0.83(0.54 to 1.27)
	eQTLGen	NAA60	MR-Egger	-0.186288	0.152117	0.220715	3	0.259521	0.83(0.62 to 1.12)
	eQTLGen	HECTD3	MR-Egger	-0.478512	0.192637	0.0129913	3	0.040098	0.62(0.42 to 0.90)
	eQTLGen	MAU2	MR-Egger	-0.0992876	0.0443911	0.025309	21	0.0514222	0.91(0.83 to 0.99)
	eQTLGen	SLC15A4	MR-Egger	-0.580274	0.419874	0.166966	3	0.206138	0.56(0.25 to 1.27)
	eQTLGen	HDHD2	MR-Egger	0.146393	0.0632095	0.0505588	3	0.0471384	1.16(1.02 to 1.31)
	eQTLGen	ZNF23	MR-Egger	-0.20039	0.106022	0.0587467	6	0.0802456	0.82(0.66 to 1.01)
	eQTLGen	GRAMD1B	MR-Egger	-0.204078	0.139468	0.143395	5	0.181936	0.82(0.62 to 1.07)
	eQTLGen	AP2S1	MR-Egger	-0.00266533	1.52648	0.998607	3	0.998607	1.00(0.05 to 19.87)
	eQTLGen	PYGB	MR-Egger	-0.0479763	0.0329347	0.145197	31	0.182778	0.95(0.89 to 1.02)
	eQTLGen	INVS	MR-Egger	-0.170265	0.140737	0.226353	9	0.263791	0.84(0.64 to 1.11)
	eQTLGen	NQO2	MR-Egger	-0.0343678	0.0367475	0.349664	20	0.381776	0.97(0.90 to 1.04)
	eQTLGen	PTPN12	MR-Egger	0.148032	0.0743218	0.0463962	13	0.0660549	1.16(1.00 to 1.34)
	eQTLGen	SPCS3	MR-Egger	-0.373523	0.178624	0.0365178	3	0.0609061	0.69(0.48 to 0.98)
	eQTLGen	SYTL2	MR-Egger	-0.0815862	0.0659473	0.216034	17	0.254952	0.92(0.81 to 1.05)
	eQTLGen	COMMD10	MR-Egger	0.192162	0.111682	0.0853188	12	0.113171	1.21(0.97 to 1.51)
	eQTLGen	INIP	MR-Egger	-0.201329	0.458192	0.660373	3	0.683805	0.82(0.33 to 2.01)
	eQTLGen	MERTK	MR-Egger	-0.0228263	0.0407896	0.575746	16	0.605949	0.98(0.90 to 1.06)
	eQTLGen	PRPSAP1	MR-Egger	-0.314415	0.569598	0.580953	3	0.609431	0.73(0.24 to 2.23)
	eQTLGen	BDH2	MR-Egger	0.0426424	0.119379	0.720942	9	0.741738	1.04(0.83 to 1.32)
	eQTLGen	HPS6	MR-Egger	-0.138347	0.0799472	0.0835454	4	0.111278	0.87(0.74 to 1.02)
	eQTLGen	PITPNA	MR-Egger	0.134851	0.0665421	0.0427078	6	0.0634624	1.14(1.00 to 1.30)
	eQTLGen	EPHB4	MR-Egger	0.0822909	0.0611657	0.178504	24	0.217044	1.09(0.96 to 1.22)
	eQTLGen	TPK1	MR-Egger	0.126927	0.0895172	0.156217	10	0.195119	1.14(0.95 to 1.35)
	eQTLGen	NEBL	MR-Egger	0.0360806	0.0319304	0.258486	18	0.291137	1.04(0.97 to 1.10)
	eQTLGen	NIP7	MR-Egger	0.175974	0.121176	0.146441	6	0.183624	1.19(0.94 to 1.51)
	eQTLGen	OSER1	MR-Egger	0.0425626	0.10619	0.688557	11	0.710697	1.04(0.85 to 1.28)
	eQTLGen	GTF2A2	MR-Egger	0.0215487	0.0806397	0.789298	3	0.804333	1.02(0.87 to 1.20)
	eQTLGen	BASP1	MR-Egger	0.209281	0.136718	0.12583	8	0.160923	1.23(0.94 to 1.61)
	eQTLGen	TBK1	MR-Egger	0.325236	0.0898214	0.000293559	3	0.00612305	1.38(1.16 to 1.65)
	eQTLGen	FAM118B	MR-Egger	-0.0749065	0.0620838	0.22761	10	0.263791	0.93(0.82 to 1.05)
	eQTL_BrainMeta	SLC66A2	MR-Egger	-0.169932	0.253567	0.502752	3	0.530866	0.84(0.51 to 1.39)
	eQTL_BrainMeta	CCDC25	MR-Egger	-0.0687045	0.246198	0.780198	3	0.797591	0.93(0.58 to 1.51)
	eQTL_BrainMeta	CDK10	MR-Egger	0.20629	0.0635098	0.00116151	3	0.0133159	1.23(1.09 to 1.39)
	eQTL_BrainMeta	NME5	MR-Egger	0.0890342	0.0747831	0.233824	3	0.268101	1.09(0.94 to 1.27)
	eQTL_BrainMeta	CAPSL	MR-Egger	0.47608	0.308088	0.122281	3	0.157639	1.61(0.88 to 2.94)
	eQTL_BrainMeta	ARL17B	MR-Egger	-0.0744101	0.041588	0.073579	7	0.0996577	0.93(0.86 to 1.01)
	eQTL_BrainMeta	LRRC37A	MR-Egger	-0.0873988	0.03356	0.00920734	4	0.0342645	0.92(0.86 to 0.98)
	eQTL_BrainMeta	RASA4B	MR-Egger	-0.0478055	0.0411612	0.24547	3	0.278431	0.95(0.88 to 1.03)
	eQTL_BrainMeta	RPL9	MR-Egger	0.0445815	0.0827923	0.59025	3	0.617167	1.05(0.89 to 1.23)
	eQTL_GTEx_Whole_Blood	MYBPC3	MR-Egger	-0.0728795	0.157851	0.644299	3	0.66932	0.93(0.68 to 1.27)
	mQTL_McRae	PCBP4	MR-IVW	0.106403	0.0235277	6.11246e-06	5	0.000654033	1.11(1.06 to 1.16)
	mQTL_McRae	PCBP4	GSMR	0.105061	0.0241632	1.37416e-05	5	0.000882211	1.11(1.06 to 1.16)
	mQTL_McRae	POM121L2	MR-IVW	-0.148896	0.035994	3.52359e-05	3	0.00161582	0.86(0.80 to 0.92)
	mQTL_McRae	POM121L2	GSMR	-0.14796	0.0366923	5.51953e-05	3	0.00221471	0.86(0.80 to 0.93)
	mQTL_McRae	HABP4	MR-IVW	0.14698	0.0393241	0.000185752	3	0.00496887	1.16(1.07 to 1.25)
	mQTL_McRae	SPACA7	MR-IVW	-0.0463392	0.0127299	0.00027245	3	0.00612305	0.95(0.93 to 0.98)
	mQTL_McRae	SPACA7	GSMR	-0.0462714	0.0128145	0.000305199	3	0.00612305	0.95(0.93 to 0.98)
	mQTL_McRae	HABP4	GSMR	0.145766	0.0411217	0.000393007	3	0.00683821	1.16(1.07 to 1.25)
	mQTL_McRae	VPS13C	MR-IVW	0.0449872	0.0127192	0.000404754	6	0.00683821	1.05(1.02 to 1.07)
	mQTL_McRae	VPS13C	GSMR	0.044603	0.0128194	0.000502681	6	0.00768384	1.05(1.02 to 1.07)
	mQTL_McRae	DOK7	MR-IVW	0.0681306	0.0203979	0.000837527	3	0.0109603	1.07(1.03 to 1.11)
	mQTL_McRae	DOK7	GSMR	0.0681051	0.0205548	0.000921892	3	0.0109603	1.07(1.03 to 1.11)
	mQTL_McRae	TSC22D4	MR-IVW	-0.0460729	0.0146811	0.0016996	3	0.0155099	0.95(0.93 to 0.98)
	mQTL_McRae	TSC22D4	GSMR	-0.0459498	0.01477	0.00186438	3	0.0161747	0.96(0.93 to 0.98)
	mQTL_McRae	LOC100507548	MR-IVW	-0.0593486	0.019899	0.00285909	3	0.0183699	0.94(0.91 to 0.98)
	mQTL_BrainMeta	PXDN	MR-IVW	-0.048525	0.0162713	0.00286136	3	0.0183699	0.95(0.92 to 0.98)
	mQTL_BrainMeta	PXDN	GSMR	-0.0484449	0.0163648	0.00307337	3	0.0193441	0.95(0.92 to 0.98)
	mQTL_McRae	LOC100507548	GSMR	-0.0590323	0.0200013	0.00316316	3	0.0195265	0.94(0.91 to 0.98)
	mQTL_McRae	ABCA1	MR-IVW	-0.0322516	0.0109732	0.00329154	3	0.0199355	0.97(0.95 to 0.99)
	mQTL_McRae	ABCA1	GSMR	-0.0322335	0.0110239	0.00345611	3	0.0205446	0.97(0.95 to 0.99)
	mQTL_McRae	TMEM176B	MR-IVW	-0.0516431	0.0194256	0.00784871	4	0.0335925	0.95(0.91 to 0.99)
	mQTL_McRae	BTN2A2	MR-IVW	0.070435	0.0265771	0.00804408	3	0.03372	1.07(1.02 to 1.13)
	mQTL_McRae	TMEM176B	GSMR	-0.0512278	0.0195669	0.00884243	4	0.0342645	0.95(0.91 to 0.99)
	mQTL_McRae	BTN2A2	GSMR	0.0703875	0.0269032	0.00888828	3	0.0342645	1.07(1.02 to 1.13)
	mQTL_McRae	ARHGAP27	MR-IVW	-0.0642075	0.0246378	0.00915927	3	0.0342645	0.94(0.89 to 0.98)
	mQTL_McRae	STK39	MR-IVW	-0.130816	0.0510662	0.0104163	3	0.0361461	0.88(0.79 to 0.97)
	mQTL_McRae	ARHGAP27	GSMR	-0.0634087	0.0248942	0.0108613	3	0.0361461	0.94(0.89 to 0.99)
	mQTL_McRae	CDC7	MR-IVW	-0.028716	0.0112971	0.0110256	3	0.0361461	0.97(0.95 to 0.99)
	mQTL_McRae	CDC7	GSMR	-0.0287265	0.0113502	0.0113765	3	0.0365185	0.97(0.95 to 0.99)
	mQTL_McRae	DIP2A	MR-IVW	0.0517316	0.0207391	0.0126171	3	0.0393213	1.05(1.01 to 1.10)
	mQTL_McRae	DIP2A	GSMR	0.0516683	0.0209745	0.0137629	3	0.0405681	1.05(1.01 to 1.10)
	mQTL_McRae	FXYD6	MR-IVW	0.0721593	0.0295769	0.0146988	3	0.0407732	1.07(1.01 to 1.14)
	mQTL_McRae	PLA2G4C-AS1	MR-IVW	0.0614284	0.0252515	0.0149883	3	0.0407732	1.06(1.01 to 1.12)
	mQTL_McRae	IDH3A	MR-IVW	-0.0624138	0.0258289	0.0156733	3	0.0415796	0.94(0.89 to 0.99)
	mQTL_McRae	PLA2G4C-AS1	GSMR	0.0611418	0.0254549	0.0163074	3	0.0422367	1.06(1.01 to 1.12)
	mQTL_McRae	FXYD6	GSMR	0.0719933	0.029975	0.0163158	3	0.0422367	1.07(1.01 to 1.14)
	mQTL_McRae	TK2	MR-IVW	-0.0433498	0.0181998	0.0172246	3	0.0435362	0.96(0.92 to 0.99)
	mQTL_McRae	TK2	GSMR	-0.043333	0.0182738	0.0177246	3	0.04445	0.96(0.92 to 0.99)
	mQTL_McRae	IDH3A	GSMR	-0.0622668	0.0263604	0.0181702	3	0.0451892	0.94(0.89 to 0.99)
	mQTL_McRae	STK39	GSMR	-0.12457	0.053708	0.0203735	3	0.0471384	0.88(0.79 to 0.98)
	mQTL_McRae	CRYGD	MR-IVW	-0.04593	0.0199301	0.0211916	3	0.0477677	0.96(0.92 to 0.99)
	mQTL_McRae	F2RL3	MR-IVW	-0.0326939	0.0141963	0.0212797	5	0.0477677	0.97(0.94 to 1.00)
	mQTL_McRae	F2RL3	GSMR	-0.0326451	0.0142891	0.0223358	5	0.04843	0.97(0.94 to 1.00)
	mQTL_McRae	NOL10	MR-IVW	0.0455312	0.0199315	0.0223489	3	0.04843	1.05(1.01 to 1.09)
	mQTL_McRae	NOL10	GSMR	0.0458589	0.0200762	0.0223574	3	0.04843	1.05(1.01 to 1.09)
	mQTL_McRae	CRYGD	GSMR	-0.0456942	0.0200424	0.0226151	3	0.04843	0.96(0.92 to 0.99)
	mQTL_McRae	NMS	GSMR	0.0304611	0.013397	0.0229821	6	0.04843	1.03(1.00 to 1.06)
	mQTL_McRae	BRSK2	MR-IVW	0.0263388	0.0118979	0.0268469	5	0.0531967	1.03(1.00 to 1.05)
	mQTL_McRae	BRSK2	GSMR	0.026323	0.0119444	0.0275384	5	0.0536318	1.03(1.00 to 1.05)
	mQTL_McRae	FAM171A1	MR-IVW	0.0605607	0.0276896	0.0287332	3	0.0540674	1.06(1.01 to 1.12)
	mQTL_McRae	LINC00200	MR-IVW	-0.0660531	0.0303747	0.0296593	3	0.0550325	0.94(0.88 to 0.99)
	mQTL_McRae	FAM171A1	GSMR	0.0601468	0.0280013	0.0317134	3	0.0575142	1.06(1.01 to 1.12)
	mQTL_McRae	LINC00200	GSMR	-0.0658158	0.0307133	0.0321203	3	0.0576012	0.94(0.88 to 0.99)
	mQTL_McRae	LIMCH1	MR-IVW	0.0350747	0.0164279	0.032756	3	0.057869	1.04(1.00 to 1.07)
	mQTL_McRae	ETV1	MR-IVW	0.0317896	0.0150732	0.0349428	3	0.059663	1.03(1.00 to 1.06)
	mQTL_McRae	ETV1	GSMR	0.031803	0.0151255	0.0355005	3	0.0601277	1.03(1.00 to 1.06)
	mQTL_McRae	LIMCH1	GSMR	0.034339	0.0165456	0.0379478	3	0.0609061	1.03(1.00 to 1.07)
	mQTL_McRae	VWDE	GSMR	-0.0284934	0.013884	0.0401451	6	0.0627707	0.97(0.95 to 1.00)
	mQTL_McRae	IQCE	MR-IVW	0.025665	0.0125265	0.0404762	3	0.0627707	1.03(1.00 to 1.05)
	mQTL_McRae	IQCE	GSMR	0.0256648	0.0125832	0.0413887	3	0.0634624	1.03(1.00 to 1.05)
	mQTL_McRae	VWDE	MR-IVW	-0.0285665	0.0140126	0.0414876	6	0.0634624	0.97(0.95 to 1.00)
	mQTL_McRae	UBE2I	MR-IVW	0.0317679	0.0156742	0.0426869	5	0.0634624	1.03(1.00 to 1.06)
	mQTL_McRae	UBE2I	GSMR	0.031763	0.0157188	0.0433104	5	0.0634624	1.03(1.00 to 1.06)
	mQTL_McRae	KCNA6	MR-IVW	-0.0448824	0.0223338	0.0444717	3	0.064515	0.96(0.92 to 1.00)
	mQTL_McRae	KCNA6	GSMR	-0.0448203	0.0224619	0.0459996	3	0.065919	0.96(0.91 to 1.00)
	mQTL_McRae	NMS	MR-IVW	0.0302717	0.0152507	0.0471511	6	0.0660939	1.03(1.00 to 1.06)
	mQTL_BrainMeta	PXDN	MR-Egger	-0.0486825	0.0403509	0.227632	3	0.263791	0.95(0.88 to 1.03)
	mQTL_McRae	ABCA1	MR-Egger	-0.032901	0.0213723	0.123702	3	0.158834	0.97(0.93 to 1.01)
	mQTL_McRae	IDH3A	MR-Egger	-0.0324984	0.133268	0.807342	3	0.820116	0.97(0.75 to 1.26)
	mQTL_McRae	VPS13C	MR-Egger	0.0361102	0.0188804	0.0558018	6	0.0768771	1.04(1.00 to 1.08)
	mQTL_McRae	BTN2A2	MR-Egger	0.120016	0.159649	0.452201	3	0.483855	1.13(0.82 to 1.54)
	mQTL_McRae	LINC00200	MR-Egger	-0.045021	0.0596621	0.450489	3	0.483635	0.96(0.85 to 1.07)
	mQTL_McRae	IQCE	MR-Egger	0.0200043	0.0210126	0.34109	3	0.373686	1.02(0.98 to 1.06)
	mQTL_McRae	NOL10	MR-Egger	0.137314	0.129326	0.288341	3	0.32138	1.15(0.89 to 1.48)
	mQTL_McRae	FAM171A1	MR-Egger	0.212226	0.160206	0.18527	3	0.223578	1.24(0.90 to 1.69)
	mQTL_McRae	CRYGD	MR-Egger	-0.0305905	0.0419971	0.466371	3	0.495713	0.97(0.89 to 1.05)
	mQTL_McRae	NMS	MR-Egger	0.059643	0.0438246	0.17353	6	0.212607	1.06(0.97 to 1.16)
	mQTL_McRae	POM121L2	MR-Egger	-5.08971	3.61594	0.159257	3	0.19738	0.01(0.00 to 7.37)
	mQTL_McRae	TSC22D4	MR-Egger	-0.0218947	0.0293269	0.45532	3	0.485574	0.98(0.92 to 1.04)
	mQTL_McRae	KCNA6	MR-Egger	-0.186044	0.140187	0.184471	3	0.223454	0.83(0.63 to 1.09)
	mQTL_McRae	STK39	MR-Egger	0.0852124	0.262931	0.745873	3	0.764937	1.09(0.65 to 1.82)
	mQTL_McRae	UBE2I	MR-Egger	0.0362847	0.030479	0.233857	5	0.268101	1.04(0.98 to 1.10)
	mQTL_McRae	LIMCH1	MR-Egger	-0.10305	0.0625569	0.0994968	3	0.130361	0.90(0.80 to 1.02)
	mQTL_McRae	HABP4	MR-Egger	0.0669135	0.127106	0.598583	3	0.623848	1.07(0.83 to 1.37)
	mQTL_McRae	ETV1	MR-Egger	0.0478172	0.0373398	0.200336	3	0.237298	1.05(0.97 to 1.13)
	mQTL_McRae	PLA2G4C-AS1	MR-Egger	0.0794674	0.0491698	0.106055	3	0.137829	1.08(0.98 to 1.19)
	mQTL_McRae	SPACA7	MR-Egger	-0.0353887	0.0202194	0.0800775	3	0.107104	0.97(0.93 to 1.00)
	mQTL_McRae	DIP2A	MR-Egger	0.0782486	0.112677	0.487399	3	0.516353	1.08(0.87 to 1.35)
	mQTL_McRae	ARHGAP27	MR-Egger	-0.115942	0.102283	0.256989	3	0.29047	0.89(0.73 to 1.09)
	mQTL_McRae	DOK7	MR-Egger	0.0817297	0.0411587	0.0470645	3	0.0660939	1.09(1.00 to 1.18)
	mQTL_McRae	VWDE	MR-Egger	-0.0547303	0.0265514	0.0392746	6	0.0621041	0.95(0.90 to 1.00)
	mQTL_McRae	F2RL3	MR-Egger	-0.196495	0.216533	0.364162	5	0.396258	0.82(0.54 to 1.26)
	mQTL_McRae	PCBP4	MR-Egger	0.0925701	0.0528139	0.0796431	5	0.106968	1.10(0.99 to 1.22)
	mQTL_McRae	CDC7	MR-Egger	-0.0327325	0.0179505	0.0682294	3	0.0928036	0.97(0.93 to 1.00)
	mQTL_McRae	LOC100507548	MR-Egger	-0.056685	0.0349649	0.104975	3	0.136979	0.94(0.88 to 1.01)
	mQTL_McRae	TK2	MR-Egger	-0.0348581	0.0318683	0.274035	3	0.306499	0.97(0.91 to 1.03)
	mQTL_McRae	TMEM176B	MR-Egger	-0.0575203	0.0602244	0.339528	4	0.373248	0.94(0.84 to 1.06)
	mQTL_McRae	FXYD6	MR-Egger	0.207618	0.158158	0.189275	3	0.226707	1.23(0.90 to 1.68)
	mQTL_McRae	BRSK2	MR-Egger	0.0269713	0.0195783	0.168323	5	0.207018	1.03(0.99 to 1.07)
	eQTLGen	TRMT112	MR-IVW	-0.000871248	0.000300025	0.00368528	6	0.0215087	1.00(1.00 to 1.00)
	eQTLGen	TRMT112	GSMR	-0.0010727	0.000514574	0.037103	6	0.0609061	1.00(1.00 to 1.00)
	eQTLGen	TRMT112	MR-Egger	-0.00100622	0.000531948	0.0585479	6	0.0802456	1.00(1.00 to 1.00)
	* Only presented the association with P value after FDR adjustment < 0.05 and P for MR-Egger > 0.05
	CI, confidence interval; FDR, false dicovery rate; HEIDI, heterogeneity in dependent instruments; SNP, single nucleotide polymorphsim; OR odds ratio

## Sheet: Table S6
	Table S6. multi-variant Mendelian randomization analysis for eQTL, mQTL, sQTL, pQTL and PD in discovery stage
	qtl_name	gene_name	method	bxy	se	pval	nsnps	FDR	OR(95%CI)
	pQTL_FENLAND	EFEMP1	GSMR	-0.237434	0.0676082	0.000444895	5	0.0188372	0.79(0.69 to 0.90)
	pQTL_FENLAND	GGH	GSMR	-0.0967875	0.0314153	0.00206375	12	0.0265226	0.91(0.85 to 0.97)
	pQTL_INTERVAL	CDNF	MR-IVW	0.155257	0.059697	0.00930201	3	0.0355168	1.17(1.04 to 1.31)
	pQTL_INTERVAL	PAM	GSMR	-0.069795	0.0281738	0.0132381	9	0.0402899	0.93(0.88 to 0.99)
	pQTL_INTERVAL	CDNF	GSMR	0.147071	0.0620412	0.0177622	3	0.0480029	1.16(1.03 to 1.31)
	pQTL_FENLAND	EFEMP1	MR-IVW	-0.247837	0.106975	0.0205159	5	0.05039	0.78(0.63 to 0.96)
	pQTL_INTERVAL	PAM	MR-IVW	-0.0708212	0.0308112	0.0215304	9	0.051089	0.93(0.88 to 0.99)
	pQTL_FENLAND	GGH	MR-IVW	-0.116189	0.0511262	0.0230505	12	0.0512903	0.89(0.81 to 0.98)
	pQTL_FENLAND	MAGI2	GSMR	0.0581174	0.0295151	0.0489449	22	0.0739455	1.06(1.00 to 1.12)
	pQTL_FENLAND	MAGI2	MR-IVW	0.0583414	0.029402	0.0472266	22	0.0722399	1.06(1.00 to 1.12)
	pQTL_FENLAND	MAGI2	MR-Egger	0.0591676	0.0434273	0.173055	22	0.227135	1.06(0.97 to 1.16)
	pQTL_INTERVAL	PAM	MR-Egger	-0.0774274	0.070429	0.271608	9	0.330653	0.93(0.81 to 1.06)
	pQTL_INTERVAL	CDNF	MR-Egger	0.320003	0.408064	0.432924	3	0.492759	1.38(0.62 to 3.06)
	pQTL_FENLAND	EFEMP1	MR-Egger	-0.202513	0.266221	0.44684	5	0.507224	0.82(0.48 to 1.38)
	pQTL_FENLAND	GGH	MR-Egger	-0.0356715	0.0846561	0.673486	12	0.70716	0.96(0.82 to 1.14)
	sQTL_GTEx_Whole_Blood	PCGF3	MR-IVW	0.0429273	0.0183852	0.0195494	3	0.0488735	1.04(1.01 to 1.08)
	sQTL_GTEx_Whole_Blood	PCGF3	GSMR	0.042609	0.0186472	0.022312	3	0.0512903	1.04(1.01 to 1.08)
	sQTL_GTEx_Whole_Blood	PCGF3	MR-Egger	0.180598	0.186967	0.334077	3	0.393032	1.20(0.83 to 1.73)
	eQTLGen	CNNM4	GSMR	-0.30255	0.081638	0.000210559	3	0.0148047	0.74(0.63 to 0.87)
	eQTLGen	ASF1A	GSMR	0.178336	0.0481355	0.000211496	12	0.0148047	1.20(1.09 to 1.31)
	eQTLGen	CNNM4	MR-IVW	-0.30529	0.0808415	0.000159113	3	0.0148047	0.74(0.63 to 0.86)
	eQTLGen	CHRNB1	GSMR	-0.191691	0.0585971	0.00107042	3	0.0227705	0.83(0.74 to 0.93)
	eQTLGen	CHRNB1	MR-IVW	-0.191791	0.0583582	0.00101459	3	0.0227705	0.83(0.74 to 0.93)
	eQTLGen	KCNB1	MR-IVW	0.262265	0.0802602	0.00108431	3	0.0227705	1.30(1.11 to 1.52)
	eQTLGen	CEP85L	GSMR	-0.21689	0.0681306	0.0014553	6	0.0253953	0.81(0.70 to 0.92)
	eQTLGen	ASF1A	MR-IVW	0.179135	0.0555023	0.00124869	12	0.0238387	1.20(1.07 to 1.33)
	eQTLGen	KCNB1	GSMR	0.257925	0.0815641	0.0015656	3	0.0253953	1.29(1.10 to 1.52)
	eQTLGen	TMEM200A	GSMR	0.259165	0.0819873	0.00157209	5	0.0253953	1.30(1.10 to 1.52)
	eQTLGen	TMEM200A	MR-IVW	0.259601	0.0815873	0.00146324	5	0.0253953	1.30(1.10 to 1.52)
	eQTLGen	TRAT1	GSMR	0.192712	0.0622637	0.00196753	7	0.0265226	1.21(1.07 to 1.37)
	eQTLGen	TRAT1	MR-IVW	0.193711	0.0620162	0.00178678	7	0.0258775	1.21(1.07 to 1.37)
	eQTLGen	ST6GALNAC1	MR-IVW	0.182225	0.0592385	0.00209714	11	0.0265226	1.20(1.07 to 1.35)
	eQTLGen	ST6GALNAC1	GSMR	0.181339	0.0594407	0.00228268	11	0.0265668	1.20(1.07 to 1.35)
	eQTL_BrainMeta	ANKMY1	MR-IVW	-0.108545	0.035367	0.00214707	3	0.0265226	0.90(0.84 to 0.96)
	eQTL_BrainMeta	ANKMY1	GSMR	-0.107913	0.0359927	0.00271594	3	0.0286277	0.90(0.84 to 0.96)
	eQTL_BrainMeta	IL15	MR-IVW	-0.177282	0.0585634	0.00246843	3	0.0272826	0.84(0.75 to 0.94)
	eQTLGen	PDCD1LG2	GSMR	-0.208707	0.0698464	0.00280735	5	0.0287582	0.81(0.71 to 0.93)
	eQTLGen	ANAPC4	GSMR	-0.149742	0.0506236	0.00309684	15	0.0293688	0.86(0.78 to 0.95)
	eQTL_BrainMeta	IL15	GSMR	-0.175568	0.0603471	0.00362239	3	0.0296612	0.84(0.75 to 0.94)
	eQTL_BrainMeta	EIF3C	MR-IVW	0.107852	0.0376852	0.00421076	3	0.0321549	1.11(1.03 to 1.20)
	eQTLGen	CMTR2	GSMR	0.105674	0.0373393	0.00465325	16	0.0323872	1.11(1.03 to 1.20)
	eQTLGen	IKBIP	GSMR	0.174643	0.0626634	0.00531976	9	0.0323872	1.19(1.05 to 1.35)
	eQTLGen	GLIS3	MR-IVW	-0.370531	0.134471	0.0058607	3	0.0323872	0.69(0.53 to 0.90)
	eQTLGen	GLIS3	GSMR	-0.368768	0.135869	0.00664479	3	0.0323872	0.69(0.53 to 0.90)
	eQTL_BrainMeta	EIF3C	GSMR	0.104943	0.0389049	0.00698782	3	0.0323872	1.11(1.03 to 1.20)
	eQTL_BrainMeta	RCBTB1	MR-IVW	0.0601461	0.0219456	0.00613101	3	0.0323872	1.06(1.02 to 1.11)
	eQTLGen	ENPP4	GSMR	0.113216	0.0420852	0.00714155	12	0.0323872	1.12(1.03 to 1.22)
	eQTLGen	ANKRD26	GSMR	-0.171519	0.0640048	0.00736711	5	0.0323872	0.84(0.74 to 0.95)
	eQTL_BrainMeta	RCBTB1	GSMR	0.0593443	0.0221838	0.00747041	3	0.0323872	1.06(1.02 to 1.11)
	eQTLGen	PDCD1LG2	MR-IVW	-0.209207	0.0771408	0.00668742	5	0.0323872	0.81(0.70 to 0.94)
	eQTLGen	ENPP4	MR-IVW	0.113733	0.0420055	0.00677744	12	0.0323872	1.12(1.03 to 1.22)
	eQTL_BrainMeta	SCD5	GSMR	-0.0768735	0.0288363	0.00767921	3	0.0323872	0.93(0.88 to 0.98)
	eQTL_BrainMeta	SCD5	MR-IVW	-0.0769872	0.0284427	0.0067946	3	0.0323872	0.93(0.88 to 0.98)
	eQTLGen	IKBIP	MR-IVW	0.177551	0.0656199	0.00681494	9	0.0323872	1.19(1.05 to 1.36)
	eQTLGen	APBB1IP	GSMR	-0.179215	0.067333	0.00777652	7	0.0323872	0.84(0.73 to 0.95)
	eQTLGen	APBB1IP	MR-IVW	-0.180044	0.0670981	0.00728997	7	0.0323872	0.84(0.73 to 0.95)
	eQTLGen	PCYOX1	MR-IVW	-0.297473	0.110932	0.00732782	3	0.0323872	0.74(0.60 to 0.92)
	eQTLGen	KPNA1	GSMR	0.218934	0.0829762	0.00832711	6	0.0337604	1.24(1.06 to 1.46)
	eQTLGen	ANAPC4	MR-IVW	-0.150621	0.0562876	0.00745261	15	0.0323872	0.86(0.77 to 0.96)
	eQTLGen	PCYOX1	GSMR	-0.294519	0.11218	0.00865457	3	0.0342917	0.74(0.60 to 0.93)
	eQTLGen	CMTR2	MR-IVW	0.107268	0.0404962	0.00807666	16	0.0332568	1.11(1.03 to 1.21)
	eQTLGen	SULT1A2	GSMR	-0.087178	0.0340125	0.0103738	9	0.0374832	0.92(0.86 to 0.98)
	eQTL_BrainMeta	PEX6	GSMR	0.0419033	0.0163741	0.0104939	4	0.0374832	1.04(1.01 to 1.08)
	eQTL_BrainMeta	PEX6	MR-IVW	0.0421858	0.0162924	0.00961721	4	0.0360645	1.04(1.01 to 1.08)
	eQTLGen	SULT1A2	MR-IVW	-0.0880537	0.0343148	0.0102862	9	0.0374832	0.92(0.86 to 0.98)
	eQTLGen	PDZK1IP1	MR-IVW	-0.177431	0.0699907	0.0112427	19	0.0381313	0.84(0.73 to 0.96)
	eQTLGen	PMM1	MR-IVW	-0.154119	0.0610993	0.0116545	6	0.0381576	0.86(0.76 to 0.97)
	eQTLGen	PDZK1IP1	GSMR	-0.175177	0.070403	0.0128391	19	0.0399439	0.84(0.73 to 0.96)
	eQTLGen	PMM1	GSMR	-0.152196	0.0614167	0.013209	6	0.0402899	0.86(0.76 to 0.97)
	eQTL_GTEx_Whole_Blood	NT5DC2	MR-IVW	0.14215	0.058379	0.0148938	3	0.0443646	1.15(1.03 to 1.29)
	eQTLGen	PRR4	GSMR	-0.120446	0.0504765	0.0170246	13	0.0480029	0.89(0.80 to 0.98)
	eQTL_BrainMeta	CCDC3	MR-IVW	-0.093815	0.038704	0.0153545	3	0.0450972	0.91(0.84 to 0.98)
	eQTL_BrainMeta	CCDC3	GSMR	-0.0929892	0.039142	0.0175162	3	0.0480029	0.91(0.84 to 0.98)
	eQTLGen	PRR4	MR-IVW	-0.120922	0.0503449	0.0163117	13	0.0472478	0.89(0.80 to 0.98)
	eQTLGen	GNPDA2	MR-IVW	-0.27458	0.114921	0.0168809	3	0.0480029	0.76(0.61 to 0.95)
	eQTLGen	GNPDA2	GSMR	-0.273944	0.115858	0.0180552	3	0.0480029	0.76(0.61 to 0.95)
	eQTLGen	KCTD10	GSMR	-0.0836196	0.0355686	0.0187261	18	0.0480029	0.92(0.86 to 0.99)
	eQTLGen	ANKRD26	MR-IVW	-0.173337	0.0731938	0.0178755	5	0.0480029	0.84(0.73 to 0.97)
	eQTLGen	SLC25A1	MR-IVW	-0.131649	0.0560069	0.018744	6	0.0480029	0.88(0.79 to 0.98)
	eQTLGen	SLC25A1	GSMR	-0.131252	0.0561991	0.0195185	6	0.0488735	0.88(0.79 to 0.98)
	eQTLGen	PI3	GSMR	0.119777	0.0522813	0.0219634	6	0.0512903	1.13(1.02 to 1.25)
	eQTL_GTEx_Whole_Blood	NT5DC2	GSMR	0.136554	0.0599965	0.022844	3	0.0512903	1.15(1.02 to 1.29)
	eQTLGen	HORMAD1	GSMR	-0.151505	0.0665945	0.0229039	4	0.0512903	0.86(0.75 to 0.98)
	eQTLGen	PI3	MR-IVW	0.11993	0.0521734	0.0215235	6	0.051089	1.13(1.02 to 1.25)
	eQTL_BrainMeta	SLC1A7	GSMR	-0.0419935	0.018533	0.0234591	3	0.0512903	0.96(0.92 to 0.99)
	eQTLGen	HORMAD1	MR-IVW	-0.151743	0.0664064	0.022309	4	0.0512903	0.86(0.75 to 0.98)
	eQTL_BrainMeta	SLC1A7	MR-IVW	-0.0421281	0.0184536	0.0224353	3	0.0512903	0.96(0.92 to 0.99)
	eQTLGen	CCNL1	GSMR	-0.116285	0.0533741	0.0293556	3	0.0565185	0.89(0.80 to 0.99)
	eQTLGen	CD274	GSMR	-0.269244	0.12469	0.0308257	3	0.0578976	0.76(0.60 to 0.98)
	eQTLGen	PLXDC2	GSMR	-0.22259	0.103495	0.0314979	6	0.0580882	0.80(0.65 to 0.98)
	eQTLGen	DAP	GSMR	-0.118942	0.0555743	0.0323359	14	0.0590482	0.89(0.80 to 0.99)
	eQTLGen	PLXDC2	MR-IVW	-0.225336	0.102674	0.0281877	6	0.0564132	0.80(0.65 to 0.98)
	eQTLGen	CD274	MR-IVW	-0.271786	0.123897	0.0282604	3	0.0564132	0.76(0.60 to 0.97)
	eQTL_BrainMeta	HFM1	GSMR	-0.0693712	0.0325564	0.0331055	3	0.0599324	0.93(0.88 to 0.99)
	eQTLGen	CCNL1	MR-IVW	-0.116278	0.0532773	0.0290718	3	0.0564132	0.89(0.80 to 0.99)
	eQTLGen	GGPS1	GSMR	0.138901	0.065285	0.0333693	4	0.0601506	1.15(1.01 to 1.31)
	eQTLGen	BOK	GSMR	0.119277	0.0562314	0.0339067	6	0.0603425	1.13(1.01 to 1.26)
	eQTL_BrainMeta	HFM1	MR-IVW	-0.0695638	0.032324	0.031391	3	0.0580882	0.93(0.88 to 0.99)
	eQTLGen	DAP	MR-IVW	-0.119194	0.0554296	0.0315258	14	0.0580882	0.89(0.80 to 0.99)
	eQTLGen	FHOD1	GSMR	-0.146019	0.0697935	0.0364248	3	0.0624705	0.86(0.75 to 0.99)
	eQTLGen	GGPS1	MR-IVW	0.138921	0.0651553	0.0329948	4	0.0599324	1.15(1.01 to 1.31)
	eQTLGen	BOK	MR-IVW	0.1187	0.0560632	0.0342386	6	0.0604211	1.13(1.01 to 1.26)
	eQTLGen	FHOD1	MR-IVW	-0.146002	0.0696627	0.0360969	3	0.0623897	0.86(0.75 to 0.99)
	eQTLGen	TMEM50A	GSMR	-0.0705856	0.0347076	0.0419795	8	0.0667856	0.93(0.87 to 1.00)
	eQTLGen	CEP85L	MR-IVW	-0.221877	0.107286	0.0386318	6	0.0631337	0.80(0.65 to 0.99)
	eQTLGen	CERS5	GSMR	0.0674361	0.0334289	0.0436641	13	0.0679219	1.07(1.00 to 1.14)
	eQTLGen	CERS5	MR-IVW	0.0682	0.0333682	0.040967	13	0.0663042	1.07(1.00 to 1.14)
	eQTLGen	TMEM50A	MR-IVW	-0.0707584	0.0346593	0.0411971	8	0.0663042	0.93(0.87 to 1.00)
	eQTL_BrainMeta	IL15	MR-Egger	-0.309154	0.160428	0.0539721	3	0.080384	0.73(0.54 to 1.01)
	eQTL_BrainMeta	POMT2	GSMR	0.0782685	0.0393091	0.0464695	3	0.0714915	1.08(1.00 to 1.17)
	eQTL_BrainMeta	POMT2	MR-IVW	0.0787427	0.0387182	0.0419782	3	0.0667856	1.08(1.00 to 1.17)
	eQTLGen	ASF1A	MR-Egger	0.172864	0.0901248	0.0551041	12	0.08178	1.19(1.00 to 1.42)
	eQTLGen	TRAT1	MR-Egger	0.181707	0.0951794	0.0562492	7	0.0831855	1.20(1.00 to 1.45)
	eQTLGen	FHOD1	MR-Egger	-0.186736	0.0981045	0.0569836	3	0.0839758	0.83(0.68 to 1.01)
	eQTLGen	TMEM200A	MR-Egger	0.227923	0.120265	0.0580704	5	0.084981	1.26(0.99 to 1.59)
	eQTLGen	KPNA1	MR-IVW	0.221716	0.110751	0.0452927	6	0.0699372	1.25(1.00 to 1.55)
	eQTLGen	KCTD10	MR-IVW	-0.0842621	0.0424793	0.0472999	18	0.0722399	0.92(0.85 to 1.00)
	eQTL_BrainMeta	CCDC3	MR-Egger	-0.248633	0.13358	0.0627015	3	0.0911232	0.78(0.60 to 1.01)
	eQTLGen	ANAPC4	MR-Egger	-0.180316	0.0994281	0.0697504	15	0.100326	0.84(0.69 to 1.01)
	eQTLGen	ST6GALNAC1	MR-Egger	0.174302	0.103591	0.0924542	11	0.131001	1.19(0.97 to 1.46)
	eQTLGen	PI3	MR-Egger	0.137679	0.0827228	0.0960442	6	0.134912	1.15(0.98 to 1.35)
	eQTL_BrainMeta	HFM1	MR-Egger	-0.102047	0.0619271	0.0993809	3	0.139133	0.90(0.80 to 1.02)
	eQTLGen	SLC25A1	MR-Egger	-0.168475	0.108968	0.122083	6	0.166477	0.84(0.68 to 1.05)
	eQTLGen	CMTR2	MR-Egger	0.108059	0.0738197	0.143243	16	0.192827	1.11(0.96 to 1.29)
	eQTLGen	BOK	MR-Egger	0.179728	0.125882	0.153364	6	0.204485	1.20(0.94 to 1.53)
	eQTLGen	CEP85L	MR-Egger	-0.382605	0.278677	0.169773	6	0.224228	0.68(0.40 to 1.18)
	eQTL_GTEx_Whole_Blood	NT5DC2	MR-Egger	0.367759	0.270995	0.17476	3	0.228658	1.44(0.85 to 2.46)
	eQTLGen	TMEM50A	MR-Egger	-0.0742431	0.0554585	0.180664	8	0.234919	0.93(0.83 to 1.04)
	eQTLGen	KPNA1	MR-Egger	0.368769	0.288657	0.201413	6	0.258327	1.45(0.82 to 2.55)
	eQTLGen	DAP	MR-Egger	-0.143982	0.114587	0.208925	14	0.265905	0.87(0.69 to 1.08)
	eQTL_BrainMeta	EIF3C	MR-Egger	-0.179442	0.144127	0.213122	3	0.270426	0.84(0.63 to 1.11)
	eQTLGen	SULT1A2	MR-Egger	-0.0728263	0.0620723	0.240695	9	0.300189	0.93(0.82 to 1.05)
	eQTLGen	PDZK1IP1	MR-Egger	-0.204285	0.17852	0.252489	19	0.312819	0.82(0.57 to 1.16)
	eQTLGen	CERS5	MR-Egger	0.0859452	0.076533	0.261445	13	0.321073	1.09(0.94 to 1.27)
	eQTLGen	PLXDC2	MR-Egger	-0.433915	0.389162	0.26485	6	0.324307	0.65(0.30 to 1.39)
	eQTLGen	GLIS3	MR-Egger	-0.671672	0.628547	0.285245	3	0.343275	0.51(0.15 to 1.75)
	eQTLGen	ANKRD26	MR-Egger	-0.0964817	0.0911664	0.289917	5	0.34691	0.91(0.76 to 1.09)
	eQTL_BrainMeta	SCD5	MR-Egger	-0.079503	0.0771714	0.30291	3	0.359888	0.92(0.79 to 1.07)
	eQTLGen	IKBIP	MR-Egger	0.143683	0.139592	0.303334	9	0.359888	1.15(0.88 to 1.52)
	eQTLGen	PCYOX1	MR-Egger	0.588715	0.585409	0.314586	3	0.372186	1.80(0.57 to 5.68)
	eQTLGen	CCNL1	MR-Egger	-0.403519	0.429444	0.347407	3	0.406437	0.67(0.29 to 1.55)
	eQTL_BrainMeta	SLC1A7	MR-Egger	-0.0331306	0.0375744	0.377922	3	0.438473	0.97(0.90 to 1.04)
	eQTLGen	CD274	MR-Egger	-0.297751	0.340968	0.382527	3	0.441377	0.74(0.38 to 1.45)
	eQTLGen	GNPDA2	MR-Egger	-0.641972	0.738277	0.384544	3	0.442489	0.53(0.12 to 2.24)
	eQTLGen	PMM1	MR-Egger	-0.0931229	0.108436	0.390462	6	0.44685	0.91(0.74 to 1.13)
	eQTL_BrainMeta	POMT2	MR-Egger	0.193276	0.265816	0.467162	3	0.528863	1.21(0.72 to 2.04)
	eQTLGen	PDCD1LG2	MR-Egger	0.588874	0.831666	0.478904	5	0.537929	1.80(0.35 to 9.20)
	eQTLGen	KCTD10	MR-Egger	-0.0628544	0.0887911	0.479013	18	0.537929	0.94(0.79 to 1.12)
	eQTLGen	CNNM4	MR-Egger	-0.251854	0.360671	0.484994	3	0.543193	0.78(0.38 to 1.58)
	eQTLGen	CHRNB1	MR-Egger	-0.174425	0.253879	0.492058	3	0.548181	0.84(0.51 to 1.38)
	eQTLGen	PRR4	MR-Egger	-0.0592564	0.0903725	0.512023	13	0.567413	0.94(0.79 to 1.13)
	eQTLGen	APBB1IP	MR-Egger	-0.0685851	0.112537	0.54223	7	0.591524	0.93(0.75 to 1.16)
	eQTLGen	GGPS1	MR-Egger	0.160195	0.264072	0.544094	4	0.59202	1.17(0.70 to 1.97)
	eQTL_BrainMeta	PEX6	MR-Egger	0.0149841	0.0289238	0.604421	4	0.650915	1.02(0.96 to 1.07)
	eQTLGen	ENPP4	MR-Egger	0.0460644	0.092827	0.619726	12	0.662075	1.05(0.87 to 1.26)
	eQTL_BrainMeta	RCBTB1	MR-Egger	-0.0281339	0.102717	0.784164	3	0.81522	0.97(0.79 to 1.19)
	eQTLGen	HORMAD1	MR-Egger	0.0746673	0.455258	0.869723	4	0.888739	1.08(0.44 to 2.63)
	eQTLGen	KCNB1	MR-Egger	0.0141682	0.18378	0.938549	3	0.949857	1.01(0.71 to 1.45)
	eQTL_BrainMeta	ANKMY1	MR-Egger	0.00870289	0.119432	0.94191	3	0.950967	1.01(0.80 to 1.27)
	mQTL_McRae	OAZ2	GSMR	-0.086424	0.0291216	0.00300044	3	0.0293067	0.92(0.87 to 0.97)
	mQTL_McRae	OAZ2	MR-IVW	-0.0865447	0.0288771	0.00272645	3	0.0286277	0.92(0.87 to 0.97)
	mQTL_McRae	SETDB1	GSMR	-0.0554962	0.0203436	0.00637301	3	0.0323872	0.95(0.91 to 0.98)
	mQTL_McRae	SETDB1	MR-IVW	-0.0555282	0.0202276	0.00604792	3	0.0323872	0.95(0.91 to 0.98)
	mQTL_McRae	GAPDHS	MR-IVW	0.101774	0.0373672	0.00645732	3	0.0323872	1.11(1.03 to 1.19)
	mQTL_McRae	NT5DC2	GSMR	-0.0552904	0.0207514	0.00771212	4	0.0323872	0.95(0.91 to 0.99)
	mQTL_McRae	NT5DC2	MR-IVW	-0.055734	0.0206316	0.00690497	4	0.0323872	0.95(0.91 to 0.98)
	mQTL_McRae	C1orf52	MR-IVW	0.0544619	0.0209336	0.00927786	3	0.0355168	1.06(1.01 to 1.10)
	mQTL_McRae	GAPDHS	GSMR	0.0971882	0.0382923	0.0111469	3	0.0381313	1.10(1.02 to 1.19)
	mQTL_McRae	C1orf52	GSMR	0.052959	0.0210725	0.0119649	3	0.0381576	1.05(1.01 to 1.10)
	mQTL_McRae	BAMBI	GSMR	0.066409	0.0264339	0.011996	3	0.0381576	1.07(1.01 to 1.13)
	mQTL_McRae	BAMBI	MR-IVW	0.0665626	0.0262966	0.0113665	3	0.0381313	1.07(1.02 to 1.13)
	mQTL_McRae	KCNA6	GSMR	0.0781954	0.0331356	0.018282	3	0.0480029	1.08(1.01 to 1.15)
	mQTL_McRae	KCNA6	MR-IVW	0.0782148	0.0329409	0.0175778	3	0.0480029	1.08(1.01 to 1.15)
	mQTL_BrainMeta	GLT8D2	GSMR	0.0334426	0.014699	0.0228966	3	0.0512903	1.03(1.00 to 1.06)
	mQTL_McRae	FLJ13224	GSMR	0.0734974	0.0325625	0.0240009	3	0.0515584	1.08(1.01 to 1.15)
	mQTL_McRae	ESPNL	GSMR	-0.0520965	0.0231545	0.0244517	3	0.0516067	0.95(0.91 to 0.99)
	mQTL_McRae	GIPC2	GSMR	-0.0330535	0.0147401	0.0249338	3	0.0522642	0.97(0.94 to 1.00)
	mQTL_McRae	FLJ13224	MR-IVW	0.0735119	0.0323784	0.0231835	3	0.0512903	1.08(1.01 to 1.15)
	mQTL_BrainMeta	GLT8D2	MR-IVW	0.0330734	0.0146079	0.0235691	3	0.0512903	1.03(1.00 to 1.06)
	mQTL_McRae	ESPNL	MR-IVW	-0.052102	0.0230979	0.0240892	3	0.0515584	0.95(0.91 to 0.99)
	mQTL_McRae	GIPC2	MR-IVW	-0.033096	0.0146899	0.0242608	3	0.0515584	0.97(0.94 to 1.00)
	mQTL_McRae	TREX1	GSMR	0.0856062	0.0406837	0.0353619	3	0.0613719	1.09(1.01 to 1.18)
	mQTL_McRae	TREX1	MR-IVW	0.0860044	0.0401463	0.0321714	3	0.0590044	1.09(1.01 to 1.18)
	mQTL_McRae	SMCO1	GSMR	0.0468814	0.0224774	0.0370046	3	0.062571	1.05(1.00 to 1.10)
	mQTL_McRae	STK3	GSMR	0.0714502	0.0343471	0.0375035	3	0.062571	1.07(1.00 to 1.15)
	mQTL_McRae	SMCO1	MR-IVW	0.0473425	0.0223518	0.0341703	3	0.0604211	1.05(1.00 to 1.10)
	mQTL_McRae	SPATS2L	GSMR	-0.0364443	0.0176028	0.0384184	5	0.0630301	0.96(0.93 to 1.00)
	mQTL_McRae	STK3	MR-IVW	0.0718777	0.0341008	0.0350483	3	0.06108	1.07(1.01 to 1.15)
	mQTL_McRae	SPATS2L	MR-IVW	-0.0364331	0.0175392	0.0377792	5	0.0626717	0.96(0.93 to 1.00)
	mQTL_McRae	BAG4	GSMR	-0.0333239	0.0169955	0.0499081	3	0.0748622	0.97(0.94 to 1.00)
	mQTL_BrainMeta	GLT8D2	MR-Egger	0.132533	0.069881	0.0578861	3	0.084981	1.14(1.00 to 1.31)
	mQTL_McRae	BAG4	MR-IVW	-0.0333333	0.0169478	0.0492033	3	0.0740695	0.97(0.94 to 1.00)
	mQTL_McRae	ESPNL	MR-Egger	-0.0591946	0.0340808	0.0824062	3	0.117324	0.94(0.88 to 1.01)
	mQTL_McRae	BAMBI	MR-Egger	0.0929839	0.0581538	0.109836	3	0.152752	1.10(0.98 to 1.23)
	mQTL_McRae	SPATS2L	MR-Egger	-0.0661136	0.0416289	0.112249	5	0.155081	0.94(0.86 to 1.02)
	mQTL_McRae	STK3	MR-Egger	0.323048	0.234058	0.167524	3	0.221956	1.38(0.87 to 2.19)
	mQTL_McRae	OAZ2	MR-Egger	-0.0586664	0.052209	0.261148	3	0.321073	0.94(0.85 to 1.04)
	mQTL_McRae	SMCO1	MR-Egger	0.172421	0.196633	0.380558	3	0.440316	1.19(0.81 to 1.75)
	mQTL_McRae	BAG4	MR-Egger	-0.0284976	0.0393542	0.468985	3	0.529499	0.97(0.90 to 1.05)
	mQTL_McRae	SETDB1	MR-Egger	-0.0642153	0.0927437	0.488689	3	0.545876	0.94(0.78 to 1.12)
	mQTL_McRae	FLJ13224	MR-Egger	0.0897124	0.133019	0.500035	3	0.555595	1.09(0.84 to 1.42)
	mQTL_McRae	GIPC2	MR-Egger	-0.0435981	0.067129	0.516036	3	0.570356	0.96(0.84 to 1.09)
	mQTL_McRae	NT5DC2	MR-Egger	-0.0286627	0.0468872	0.540992	4	0.591524	0.97(0.89 to 1.07)
	mQTL_McRae	GAPDHS	MR-Egger	1.73135	3.48423	0.619253	3	0.662075	5.65(0.01 to 5220.99)
	mQTL_McRae	TREX1	MR-Egger	0.129703	0.270556	0.631659	3	0.671637	1.14(0.67 to 1.93)
	mQTL_McRae	C1orf52	MR-Egger	0.0381184	0.0809209	0.6376	3	0.676242	1.04(0.89 to 1.22)
	mQTL_McRae	KCNA6	MR-Egger	0.109895	0.259941	0.672464	3	0.70716	1.12(0.67 to 1.86)
	pQTL_FENLAND	PLA2G2A	MR-IVW	-0.117637	0.0332125	0.000397161	16	0.0188372	0.89(0.83 to 0.95)
	pQTL_FENLAND	PLA2G2A	GSMR	-0.116231	0.033358	0.000493354	16	0.0188372	0.89(0.83 to 0.95)
	pQTL_FENLAND	PSG4	MR-IVW	-0.0944324	0.0300789	0.00169242	20	0.0255408	0.91(0.86 to 0.97)
	pQTL_FENLAND	PSG4	GSMR	-0.0933158	0.0301802	0.00198846	20	0.0265226	0.91(0.86 to 0.97)
	pQTL_FENLAND	MFGE8	GSMR	0.177385	0.0582881	0.0023404	10	0.0265668	1.19(1.07 to 1.34)
	pQTL_FENLAND	MFGE8	MR-IVW	0.183581	0.0687732	0.00759951	10	0.0323872	1.20(1.05 to 1.37)
	pQTL_FENLAND	HGFAC	GSMR	-0.0689597	0.0274772	0.0120832	17	0.0381576	0.93(0.88 to 0.99)
	pQTL_INTERVAL	FCN1	GSMR	-0.0937851	0.0386026	0.0151195	3	0.0447198	0.91(0.84 to 0.98)
	pQTL_INTERVAL	FCN1	MR-IVW	-0.0922786	0.0381167	0.0154802	3	0.0451505	0.91(0.85 to 0.98)
	pQTL_FENLAND	HGFAC	MR-IVW	-0.0706705	0.0323237	0.028791	17	0.0564132	0.93(0.87 to 0.99)
	pQTL_FENLAND	ANGPTL3	MR-IVW	0.165546	0.078499	0.0349535	3	0.06108	1.18(1.01 to 1.38)
	pQTL_FENLAND	ANGPTL3	GSMR	0.16507	0.0789064	0.0364411	3	0.0624705	1.18(1.01 to 1.38)
	pQTL_FENLAND	SNX8	MR-IVW	0.289767	0.139322	0.0375406	4	0.062571	1.34(1.02 to 1.76)
	pQTL_FENLAND	SNX8	GSMR	0.288079	0.141773	0.0421566	4	0.0668142	1.33(1.01 to 1.76)
	pQTL_FENLAND	SNX8	MR-Egger	0.57162	0.339916	0.0926363	4	0.131001	1.77(0.91 to 3.45)
	pQTL_FENLAND	PLA2G2A	MR-Egger	-0.0828295	0.0524902	0.114566	16	0.157763	0.92(0.83 to 1.02)
	pQTL_FENLAND	PSG4	MR-Egger	-0.0800673	0.0514208	0.119447	20	0.163947	0.92(0.83 to 1.02)
	pQTL_FENLAND	ANGPTL3	MR-Egger	0.557798	0.359035	0.12028	3	0.164552	1.75(0.86 to 3.53)
	pQTL_INTERVAL	FCN1	MR-Egger	-0.252189	0.192447	0.190049	3	0.245517	0.78(0.53 to 1.13)
	pQTL_FENLAND	MFGE8	MR-Egger	0.187986	0.175236	0.28338	10	0.342011	1.21(0.86 to 1.70)
	pQTL_FENLAND	HGFAC	MR-Egger	0.0157613	0.0394068	0.689183	17	0.721837	1.02(0.94 to 1.10)
	sQTL_BrainMeta	ECHDC3	MR-IVW	-0.121153	0.0540568	0.0250121	3	0.0522642	0.89(0.80 to 0.98)
	sQTL_BrainMeta	ECHDC3	GSMR	-0.116471	0.0549015	0.033883	3	0.0603425	0.89(0.80 to 0.99)
	sQTL_BrainMeta	ECHDC3	MR-Egger	-1.08727	0.936474	0.245633	3	0.305224	0.34(0.05 to 2.11)
	eQTLGen	OCEL1	MR-IVW	0.23042	0.0509438	6.09621e-06	15	0.00199122	1.26(1.14 to 1.39)
	eQTLGen	OCEL1	GSMR	0.226738	0.0511979	9.482e-06	15	0.00199122	1.25(1.13 to 1.39)
	eQTLGen	BMPR2	GSMR	-0.254199	0.0656328	0.00010748	6	0.0148047	0.78(0.68 to 0.88)
	eQTLGen	CD1E	MR-IVW	-0.270845	0.0769103	0.000429004	6	0.0188372	0.76(0.66 to 0.89)
	eQTLGen	CD1E	GSMR	-0.270074	0.0773674	0.000481578	6	0.0188372	0.76(0.66 to 0.89)
	eQTLGen	RNF10	MR-IVW	0.257357	0.0749168	0.00059203	6	0.019983	1.29(1.12 to 1.50)
	eQTLGen	ZNF91	GSMR	0.201801	0.0589481	0.00061852	12	0.019983	1.22(1.09 to 1.37)
	eQTLGen	RNF10	GSMR	0.255776	0.0753021	0.000682117	6	0.0204635	1.29(1.11 to 1.50)
	eQTLGen	MFGE8	GSMR	-0.162271	0.0496168	0.00107366	9	0.0227705	0.85(0.77 to 0.94)
	eQTLGen	ZNF329	GSMR	-0.189098	0.0585849	0.00124764	8	0.0238387	0.83(0.74 to 0.93)
	eQTLGen	INTS1	GSMR	0.144581	0.0460786	0.00170272	11	0.0255408	1.16(1.06 to 1.26)
	eQTLGen	THRA	GSMR	0.176808	0.0579538	0.00228202	6	0.0265668	1.19(1.07 to 1.34)
	eQTLGen	ARHGAP5	MR-IVW	-0.277585	0.0942166	0.00321659	3	0.0293688	0.76(0.63 to 0.91)
	eQTLGen	SESN1	GSMR	-0.146992	0.0502034	0.00341234	7	0.0296612	0.86(0.78 to 0.95)
	eQTLGen	ARHGAP5	GSMR	-0.276951	0.0948239	0.00349261	3	0.0296612	0.76(0.63 to 0.91)
	eQTLGen	ZNF329	MR-IVW	-0.193711	0.0665211	0.00359098	8	0.0296612	0.82(0.72 to 0.94)
	eQTLGen	THRA	MR-IVW	0.179033	0.0614865	0.00359413	6	0.0296612	1.20(1.06 to 1.35)
	eQTLGen	LHFPL2	MR-IVW	0.314295	0.108413	0.00374297	3	0.0296612	1.37(1.11 to 1.69)
	eQTLGen	LHFPL2	GSMR	0.313689	0.109071	0.00402746	3	0.0313247	1.37(1.11 to 1.69)
	eQTLGen	BMPR2	MR-IVW	-0.257656	0.0912509	0.00474874	6	0.0323872	0.77(0.65 to 0.92)
	eQTLGen	RPL37A	MR-IVW	-0.43034	0.152508	0.00477621	3	0.0323872	0.65(0.48 to 0.88)
	eQTLGen	RPL37A	GSMR	-0.429658	0.15436	0.00537792	3	0.0323872	0.65(0.48 to 0.88)
	eQTLGen	ZNF91	MR-IVW	0.211945	0.0769196	0.00586176	12	0.0323872	1.24(1.06 to 1.44)
	eQTLGen	IQCE	MR-IVW	-0.425009	0.155112	0.00614367	3	0.0323872	0.65(0.48 to 0.89)
	eQTLGen	LRRN1	MR-IVW	-0.208113	0.0761355	0.00626726	10	0.0323872	0.81(0.70 to 0.94)
	eQTLGen	SRGAP2C	MR-IVW	0.083421	0.0307226	0.00662159	5	0.0323872	1.09(1.02 to 1.15)
	eQTLGen	IQCE	GSMR	-0.430602	0.158599	0.00662703	3	0.0323872	0.65(0.48 to 0.89)
	eQTLGen	ZFP90	MR-IVW	0.0919981	0.0339001	0.00665158	22	0.0323872	1.10(1.03 to 1.17)
	eQTLGen	LRRN1	GSMR	-0.207491	0.0765143	0.00669211	10	0.0323872	0.81(0.70 to 0.94)
	eQTL_BrainMeta	MEI1	MR-IVW	0.0899669	0.0333688	0.00701488	3	0.0323872	1.09(1.02 to 1.17)
	eQTLGen	TEF	MR-IVW	-0.134891	0.0503114	0.00733748	16	0.0323872	0.87(0.79 to 0.96)
	eQTLGen	ZFP90	GSMR	0.091092	0.0339819	0.00734894	22	0.0323872	1.10(1.02 to 1.17)
	eQTLGen	SESN1	MR-IVW	-0.149632	0.0558216	0.00735029	7	0.0323872	0.86(0.77 to 0.96)
	eQTLGen	TEF	GSMR	-0.135031	0.0504624	0.00745367	16	0.0323872	0.87(0.79 to 0.96)
	eQTL_BrainMeta	MEI1	GSMR	0.0897269	0.0336776	0.0077151	3	0.0323872	1.09(1.02 to 1.17)
	eQTLGen	SRGAP2C	GSMR	0.0825551	0.0310228	0.00778835	5	0.0323872	1.09(1.02 to 1.15)
	eQTLGen	TUB	MR-IVW	0.531814	0.201908	0.00844011	3	0.0337604	1.70(1.15 to 2.53)
	eQTLGen	TUB	GSMR	0.530875	0.20573	0.00986744	3	0.0366755	1.70(1.14 to 2.54)
	eQTLGen	COL23A1	GSMR	0.168139	0.0661586	0.0110393	9	0.0381313	1.18(1.04 to 1.35)
	eQTLGen	INTS5	MR-IVW	-0.147923	0.0584912	0.0114394	11	0.0381313	0.86(0.77 to 0.97)
	eQTLGen	ANGEL2	MR-IVW	0.147493	0.0584431	0.0116124	11	0.0381576	1.16(1.03 to 1.30)
	eQTLGen	ANGEL2	GSMR	0.147336	0.0586232	0.0119618	11	0.0381576	1.16(1.03 to 1.30)
	eQTLGen	INTS5	GSMR	-0.147337	0.0586708	0.0120306	11	0.0381576	0.86(0.77 to 0.97)
	eQTLGen	GRAMD1A	MR-IVW	-0.152162	0.061043	0.0126776	6	0.0397358	0.86(0.76 to 0.97)
	eQTLGen	GRAMD1A	GSMR	-0.15157	0.0611601	0.013203	6	0.0402899	0.86(0.76 to 0.97)
	eQTL_BrainMeta	PEX6	MR-IVW	0.0534014	0.0216859	0.0137974	4	0.04169	1.05(1.01 to 1.10)
	eQTLGen	DOCK7	MR-IVW	-0.221575	0.0935483	0.0178574	3	0.0480029	0.80(0.67 to 0.96)
	eQTLGen	DOCK7	GSMR	-0.221537	0.0938179	0.0182086	3	0.0480029	0.80(0.67 to 0.96)
	eQTLGen	INTS1	MR-IVW	0.148602	0.0631548	0.0186236	11	0.0480029	1.16(1.03 to 1.31)
	eQTL_BrainMeta	PEX6	GSMR	0.0510876	0.0218273	0.0192562	4	0.0488735	1.05(1.01 to 1.10)
	eQTL_BrainMeta	CCDC25	MR-IVW	-0.0726964	0.0310905	0.019376	3	0.0488735	0.93(0.87 to 0.99)
	eQTL_BrainMeta	CCDC25	GSMR	-0.0726761	0.0312601	0.0200782	3	0.0498869	0.93(0.87 to 0.99)
	eQTLGen	SLC18A2	MR-IVW	-0.249923	0.107598	0.0201923	3	0.0498869	0.78(0.63 to 0.96)
	eQTLGen	SLC18A2	GSMR	-0.24986	0.108162	0.0208857	3	0.0507817	0.78(0.63 to 0.96)
	eQTLGen	MFGE8	MR-IVW	-0.165041	0.0714626	0.0209172	9	0.0507817	0.85(0.74 to 0.98)
	eQTL_BrainMeta	TIGAR	MR-IVW	0.069509	0.0301271	0.0210443	4	0.0507967	1.07(1.01 to 1.14)
	eQTLGen	PHC1	MR-IVW	0.200662	0.0872393	0.0214409	3	0.051089	1.22(1.03 to 1.45)
	eQTL_BrainMeta	TIGAR	GSMR	0.0691932	0.0303417	0.0225803	4	0.0512903	1.07(1.01 to 1.14)
	eQTLGen	UHMK1	MR-IVW	-0.608248	0.266769	0.0226046	3	0.0512903	0.54(0.32 to 0.92)
	eQTLGen	PHC1	GSMR	0.200451	0.0883203	0.0232322	3	0.0512903	1.22(1.03 to 1.45)
	eQTLGen	SUSD1	MR-IVW	-0.0811331	0.0359107	0.0238647	19	0.0515584	0.92(0.86 to 0.99)
	eQTLGen	UHMK1	GSMR	-0.610069	0.27087	0.0243061	3	0.0515584	0.54(0.32 to 0.92)
	eQTLGen	SUSD1	GSMR	-0.0802237	0.0359818	0.0257765	19	0.0533308	0.92(0.86 to 0.99)
	eQTLGen	RBBP8	MR-IVW	-0.132071	0.0593422	0.0260421	7	0.0533315	0.88(0.78 to 0.98)
	eQTLGen	RBBP8	GSMR	-0.132276	0.0594485	0.0260775	7	0.0533315	0.88(0.78 to 0.98)
	eQTLGen	APOBEC3D	MR-IVW	-0.140945	0.0635612	0.0265907	3	0.0539522	0.87(0.77 to 0.98)
	eQTLGen	NCAPD2	GSMR	-0.0834319	0.0377689	0.0271741	14	0.0548707	0.92(0.85 to 0.99)
	eQTLGen	LSM8	MR-IVW	-0.13343	0.0608624	0.0283562	10	0.0564132	0.88(0.78 to 0.99)
	eQTLGen	TBK1	MR-IVW	0.174464	0.0798268	0.0288502	3	0.0564132	1.19(1.02 to 1.39)
	eQTLGen	STK11	MR-IVW	-0.163023	0.0745937	0.0288536	3	0.0564132	0.85(0.73 to 0.98)
	eQTLGen	APOBEC3D	GSMR	-0.139646	0.0639333	0.0289442	3	0.0564132	0.87(0.77 to 0.99)
	eQTLGen	STK11	GSMR	-0.163052	0.0748927	0.0294704	3	0.0565185	0.85(0.73 to 0.98)
	eQTLGen	TBK1	GSMR	0.173945	0.0800526	0.0297894	3	0.0568707	1.19(1.02 to 1.39)
	eQTLGen	NCAPD2	MR-IVW	-0.0842049	0.0388197	0.030073	14	0.0571522	0.92(0.85 to 0.99)
	eQTLGen	LSM8	GSMR	-0.132097	0.0610497	0.0304823	10	0.0576692	0.88(0.78 to 0.99)
	eQTLGen	TRPM6	GSMR	0.110274	0.0529338	0.0372291	8	0.062571	1.12(1.01 to 1.24)
	eQTLGen	ARL6IP5	MR-IVW	0.261192	0.125479	0.0373822	5	0.062571	1.30(1.02 to 1.66)
	eQTLGen	ARL6IP5	GSMR	0.261974	0.126295	0.0380507	5	0.0626717	1.30(1.01 to 1.66)
	eQTLGen	INIP	MR-IVW	0.152494	0.0743685	0.0403137	3	0.0656269	1.16(1.01 to 1.35)
	eQTLGen	INIP	GSMR	0.152303	0.0746041	0.0412033	3	0.0663042	1.16(1.01 to 1.35)
	eQTLGen	CAND2	MR-IVW	-0.11378	0.0559137	0.0418589	11	0.0667856	0.89(0.80 to 1.00)
	eQTLGen	CAND2	GSMR	-0.11352	0.0560093	0.0426831	11	0.067142	0.89(0.80 to 1.00)
	eQTLGen	TRPM6	MR-IVW	0.10991	0.0547145	0.0445601	8	0.06906	1.12(1.00 to 1.24)
	eQTLGen	CAND2	MR-Egger	-0.153687	0.0812178	0.0584531	11	0.0852441	0.86(0.73 to 1.01)
	eQTLGen	COL23A1	MR-IVW	0.173449	0.0880254	0.0487872	9	0.0739455	1.19(1.00 to 1.41)
	eQTLGen	LRRN1	MR-Egger	-0.268796	0.14532	0.0643587	10	0.0932092	0.76(0.57 to 1.02)
	eQTLGen	ANGEL2	MR-Egger	0.200876	0.110567	0.0692499	11	0.0999483	1.22(0.98 to 1.52)
	eQTLGen	INTS5	MR-Egger	-0.200271	0.112763	0.0757278	11	0.108552	0.82(0.66 to 1.02)
	eQTLGen	OCEL1	MR-Egger	0.125444	0.0778107	0.106924	15	0.149196	1.13(0.97 to 1.32)
	eQTLGen	SLC18A2	MR-Egger	-3.61658	2.2693	0.111003	3	0.153866	0.03(0.00 to 2.30)
	eQTLGen	TEF	MR-Egger	-0.152259	0.0998458	0.127274	16	0.172994	0.86(0.71 to 1.04)
	eQTLGen	GRAMD1A	MR-Egger	-0.139079	0.0921812	0.13136	6	0.177972	0.87(0.73 to 1.04)
	eQTLGen	CD1E	MR-Egger	-0.25848	0.177193	0.144633	6	0.194076	0.77(0.55 to 1.09)
	eQTLGen	COL23A1	MR-Egger	0.310884	0.217507	0.152916	9	0.204485	1.36(0.89 to 2.09)
	eQTLGen	DOCK7	MR-Egger	-0.239068	0.172595	0.166011	3	0.220647	0.79(0.56 to 1.10)
	eQTLGen	SESN1	MR-Egger	-0.0983921	0.0719056	0.171202	7	0.225407	0.91(0.79 to 1.04)
	eQTLGen	INTS1	MR-Egger	0.235928	0.175365	0.17851	11	0.23284	1.27(0.90 to 1.79)
	eQTLGen	ZFP90	MR-Egger	0.0878367	0.0671073	0.190568	22	0.245517	1.09(0.96 to 1.25)
	eQTLGen	BMPR2	MR-Egger	-0.210852	0.170438	0.216043	6	0.273307	0.81(0.58 to 1.13)
	eQTLGen	NCAPD2	MR-Egger	-0.0808716	0.0684996	0.237756	14	0.299873	0.92(0.81 to 1.05)
	eQTLGen	MFGE8	MR-Egger	-0.138669	0.117785	0.239071	9	0.300189	0.87(0.69 to 1.10)
	eQTLGen	RBBP8	MR-Egger	-0.106724	0.0909356	0.240547	7	0.300189	0.90(0.75 to 1.07)
	eQTLGen	ARHGAP5	MR-Egger	-0.315018	0.268598	0.240866	3	0.300189	0.73(0.43 to 1.24)
	eQTLGen	TRPM6	MR-Egger	0.123744	0.110134	0.261192	8	0.321073	1.13(0.91 to 1.40)
	eQTLGen	TBK1	MR-Egger	0.183867	0.168254	0.274486	3	0.333191	1.20(0.86 to 1.67)
	eQTLGen	LHFPL2	MR-Egger	0.264735	0.245909	0.281679	3	0.340937	1.30(0.80 to 2.11)
	eQTLGen	UHMK1	MR-Egger	-1.52381	1.52729	0.318413	3	0.375656	0.22(0.01 to 4.35)
	eQTLGen	LSM8	MR-Egger	-0.0988056	0.105019	0.34679	10	0.406437	0.91(0.74 to 1.11)
	eQTLGen	ZNF329	MR-Egger	-0.112449	0.178484	0.52868	8	0.582797	0.89(0.63 to 1.27)
	eQTLGen	STK11	MR-Egger	-0.123402	0.198215	0.533569	3	0.586646	0.88(0.60 to 1.30)
	eQTLGen	INIP	MR-Egger	0.393246	0.638293	0.537835	3	0.589793	1.48(0.42 to 5.18)
	eQTLGen	SRGAP2C	MR-Egger	0.0796734	0.138282	0.564502	5	0.612638	1.08(0.83 to 1.42)
	eQTLGen	RNF10	MR-Egger	-0.129691	0.262369	0.621089	6	0.662075	0.88(0.53 to 1.47)
	eQTLGen	SUSD1	MR-Egger	-0.0288916	0.0684098	0.672783	19	0.70716	0.97(0.85 to 1.11)
	eQTLGen	IQCE	MR-Egger	-0.294885	0.762132	0.698815	3	0.730105	0.74(0.17 to 3.32)
	eQTL_BrainMeta	CCDC25	MR-Egger	-0.0948736	0.343379	0.782322	3	0.81522	0.91(0.46 to 1.78)
	eQTLGen	APOBEC3D	MR-Egger	0.21565	0.824954	0.793778	3	0.823177	1.24(0.25 to 6.25)
	eQTL_BrainMeta	PEX6	MR-Egger	0.0198058	0.0993526	0.84199	4	0.866755	1.02(0.84 to 1.24)
	eQTLGen	THRA	MR-Egger	0.0207715	0.110158	0.850437	6	0.873309	1.02(0.82 to 1.27)
	eQTLGen	RPL37A	MR-Egger	-0.120274	0.648772	0.852925	3	0.873728	0.89(0.25 to 3.16)
	eQTLGen	ARL6IP5	MR-Egger	0.128294	0.795081	0.871811	5	0.888739	1.14(0.24 to 5.40)
	eQTLGen	PHC1	MR-Egger	-0.146306	1.02496	0.886492	3	0.901518	0.86(0.12 to 6.44)
	eQTLGen	TUB	MR-Egger	-0.171357	1.6266	0.916101	3	0.929377	0.84(0.03 to 20.43)
	eQTLGen	ZNF91	MR-Egger	-0.0085403	0.132492	0.948605	12	0.955429	0.99(0.76 to 1.29)
	eQTL_BrainMeta	TIGAR	MR-Egger	0.0067871	0.131621	0.958875	4	0.963463	1.01(0.78 to 1.30)
	eQTL_BrainMeta	MEI1	MR-Egger	0.00813944	0.656027	0.990101	3	0.992464	1.01(0.28 to 3.65)
	mQTL_McRae	WDR6	MR-IVW	-0.117966	0.0351268	0.000784229	3	0.0219584	0.89(0.83 to 0.95)
	mQTL_McRae	WDR6	GSMR	-0.117082	0.0355907	0.00100304	3	0.0227705	0.89(0.83 to 0.95)
	mQTL_McRae	HLCS	MR-IVW	0.0432461	0.0145302	0.00291761	3	0.0291761	1.04(1.01 to 1.07)
	mQTL_McRae	HLCS	GSMR	0.0431165	0.014601	0.00314707	3	0.0293688	1.04(1.01 to 1.07)
	mQTL_McRae	SIX5	MR-IVW	-0.0534785	0.0184239	0.00369998	3	0.0296612	0.95(0.91 to 0.98)
	mQTL_McRae	SIX5	GSMR	-0.0519872	0.018525	0.00501112	3	0.0323872	0.95(0.92 to 0.98)
	mQTL_McRae	DEFA4	MR-IVW	0.101648	0.0367019	0.00561341	3	0.0323872	1.11(1.03 to 1.19)
	mQTL_McRae	VWDE	MR-IVW	-0.0531777	0.0193604	0.00601949	6	0.0323872	0.95(0.91 to 0.98)
	mQTL_McRae	VWDE	GSMR	-0.0529094	0.0194348	0.00648075	6	0.0323872	0.95(0.91 to 0.99)
	mQTL_McRae	DEFA4	GSMR	0.101092	0.0372015	0.0065792	3	0.0323872	1.11(1.03 to 1.19)
	mQTL_McRae	USP33	MR-IVW	0.0685376	0.0260014	0.00839094	4	0.0337604	1.07(1.02 to 1.13)
	mQTL_McRae	USP33	GSMR	0.068385	0.0260908	0.0087662	4	0.0344094	1.07(1.02 to 1.13)
	mQTL_McRae	SH2D7	MR-IVW	0.0887555	0.0339894	0.00902063	3	0.0350802	1.09(1.02 to 1.17)
	mQTL_McRae	LINC00838	MR-IVW	0.0769702	0.029726	0.00961661	3	0.0360645	1.08(1.02 to 1.14)
	mQTL_McRae	SH2D7	GSMR	0.0883742	0.0343114	0.0100052	3	0.0368614	1.09(1.02 to 1.17)
	mQTL_McRae	LINC00838	GSMR	0.076611	0.0299509	0.010531	3	0.0374832	1.08(1.02 to 1.14)
	mQTL_McRae	TRMT61A	MR-IVW	0.0557127	0.0218465	0.0107664	3	0.0379992	1.06(1.01 to 1.10)
	mQTL_McRae	EHD4-AS1	MR-IVW	0.113603	0.0446543	0.0109573	3	0.0381313	1.12(1.03 to 1.22)
	mQTL_McRae	TRMT61A	GSMR	0.0555846	0.0219531	0.0113423	3	0.0381313	1.06(1.01 to 1.10)
	mQTL_McRae	PKDCC	MR-IVW	0.116306	0.0475763	0.0145003	3	0.0435009	1.12(1.02 to 1.23)
	mQTL_McRae	PKDCC	GSMR	0.11551	0.0481951	0.0165423	3	0.0475873	1.12(1.02 to 1.23)
	mQTL_McRae	EHD4-AS1	GSMR	0.108914	0.0458195	0.0174528	3	0.0480029	1.12(1.02 to 1.22)
	mQTL_McRae	PDE1C	MR-IVW	0.049115	0.0207884	0.0181466	3	0.0480029	1.05(1.01 to 1.09)
	mQTL_McRae	PDE1C	GSMR	0.0492126	0.0208734	0.0183897	3	0.0480029	1.05(1.01 to 1.09)
	mQTL_McRae	TAPT1	GSMR	0.0621276	0.0263621	0.0184382	3	0.0480029	1.06(1.01 to 1.12)
	mQTL_McRae	TAPT1	MR-IVW	0.0615748	0.0261709	0.018633	3	0.0480029	1.06(1.01 to 1.12)
	mQTL_McRae	ANKLE2	MR-IVW	0.0570768	0.025064	0.0227716	3	0.0512903	1.06(1.01 to 1.11)
	mQTL_McRae	ANKLE2	GSMR	0.0569416	0.0251433	0.023532	3	0.0512903	1.06(1.01 to 1.11)
	mQTL_BrainMeta	WT1	MR-IVW	-0.0411856	0.0184517	0.0256102	3	0.0532488	0.96(0.93 to 0.99)
	mQTL_BrainMeta	WT1	GSMR	-0.0412025	0.0185275	0.0261578	3	0.0533315	0.96(0.93 to 1.00)
	mQTL_McRae	FCN1	MR-IVW	0.120471	0.055224	0.0291468	3	0.0564132	1.13(1.01 to 1.26)
	mQTL_McRae	PDXP	MR-IVW	0.0442037	0.0204776	0.0308787	5	0.0578976	1.05(1.00 to 1.09)
	mQTL_McRae	PDXP	GSMR	0.0441721	0.0205425	0.0315336	5	0.0580882	1.05(1.00 to 1.09)
	mQTL_McRae	UXS1	MR-IVW	-0.0628033	0.0296015	0.0338694	3	0.0603425	0.94(0.89 to 1.00)
	mQTL_McRae	UXS1	GSMR	-0.062762	0.029745	0.0348583	3	0.06108	0.94(0.89 to 1.00)
	mQTL_McRae	RAB11FIP3	MR-IVW	0.0485236	0.0232294	0.0367176	3	0.062571	1.05(1.00 to 1.10)
	mQTL_McRae	RAB11FIP3	GSMR	0.0484814	0.0233105	0.0375426	3	0.062571	1.05(1.00 to 1.10)
	mQTL_McRae	FCN1	GSMR	0.119768	0.0577272	0.0380119	3	0.0626717	1.13(1.01 to 1.26)
	mQTL_McRae	TRMT61A	MR-Egger	0.10303	0.0528119	0.05107	3	0.0763323	1.11(1.00 to 1.23)
	mQTL_McRae	TMPRSS6	MR-IVW	0.0519006	0.0255625	0.0423215	3	0.0668235	1.05(1.00 to 1.11)
	mQTL_McRae	TMPRSS6	GSMR	0.0518528	0.0256496	0.0432192	3	0.0677316	1.05(1.00 to 1.11)
	mQTL_McRae	HAX1	GSMR	-0.0409511	0.020293	0.0435922	7	0.0679219	0.96(0.92 to 1.00)
	mQTL_McRae	HAX1	MR-IVW	-0.0413965	0.0209037	0.0476648	7	0.0725335	0.96(0.92 to 1.00)
	mQTL_McRae	RAB11FIP3	MR-Egger	0.0869716	0.0494709	0.0787416	3	0.112488	1.09(0.99 to 1.20)
	mQTL_McRae	SH2D7	MR-Egger	0.0803626	0.0479899	0.0940178	3	0.132508	1.08(0.99 to 1.19)
	mQTL_McRae	VWDE	MR-Egger	-0.054599	0.0371455	0.141598	6	0.191225	0.95(0.88 to 1.02)
	mQTL_McRae	ANKLE2	MR-Egger	0.0644029	0.0488984	0.187813	3	0.243462	1.07(0.97 to 1.17)
	mQTL_McRae	PKDCC	MR-Egger	0.168856	0.132269	0.201741	3	0.258327	1.18(0.91 to 1.53)
	mQTL_McRae	HLCS	MR-Egger	0.0319618	0.0254012	0.208291	3	0.265903	1.03(0.98 to 1.09)
	mQTL_McRae	TMPRSS6	MR-Egger	0.0507629	0.0460307	0.270111	3	0.329787	1.05(0.96 to 1.15)
	mQTL_McRae	EHD4-AS1	MR-Egger	0.260741	0.246069	0.289316	3	0.34691	1.30(0.80 to 2.10)
	mQTL_McRae	PDE1C	MR-Egger	0.0811334	0.0779279	0.297813	3	0.355345	1.08(0.93 to 1.26)
	mQTL_McRae	USP33	MR-Egger	0.039153	0.04337	0.366651	4	0.427759	1.04(0.96 to 1.13)
	mQTL_McRae	TAPT1	MR-Egger	0.114533	0.127207	0.367926	3	0.428058	1.12(0.87 to 1.44)
	mQTL_McRae	DEFA4	MR-Egger	0.0749224	0.0870648	0.389493	3	0.44685	1.08(0.91 to 1.28)
	mQTL_McRae	FCN1	MR-Egger	-0.304325	0.369726	0.410445	3	0.468442	0.74(0.36 to 1.52)
	mQTL_McRae	UXS1	MR-Egger	-0.289518	0.510078	0.57031	3	0.617346	0.75(0.28 to 2.03)
	mQTL_McRae	PDXP	MR-Egger	0.0265605	0.0481293	0.581046	5	0.62735	1.03(0.93 to 1.13)
	mQTL_McRae	SIX5	MR-Egger	0.0161543	0.0316985	0.610314	3	0.655581	1.02(0.96 to 1.08)
	mQTL_McRae	WDR6	MR-Egger	-0.216839	0.467763	0.642959	3	0.680208	0.81(0.32 to 2.01)
	mQTL_BrainMeta	WT1	MR-Egger	-0.0370069	0.168569	0.826233	3	0.854124	0.96(0.69 to 1.34)
	mQTL_McRae	HAX1	MR-Egger	0.00941446	0.0432512	0.827687	7	0.854124	1.01(0.93 to 1.10)
	mQTL_McRae	LINC00838	MR-Egger	0.000403248	0.0788746	0.995921	3	0.995921	1.00(0.86 to 1.17)
	* Only presented the association with P value after FDR adjustment < 0.05 and P for MR-Egger > 0.05
	CI, confidence interval; FDR, false dicovery rate; HEIDI, heterogeneity in dependent instruments; SNP, single nucleotide polymorphsim; OR odds ratio

## Sheet: Table S7
	Table S7. Colocalization analysis for association between eQTL, mQTL, sQTL, pQTL and AD in discovery stage
	gene	qtl_name	gene_id	chr	start	end	PP.H0.	PP.H1.	PP.H2.	PP.H3.	PP.H4.
	CD33	pQTL_FENLAND	ENSG00000105383	19	51225064	51243860	0.961	0.0103	0.0276	0.000294	0.000592
	BPHL	pQTL_FENLAND	ENSG00000137274	6	3118374	3153578	5.41e-53	1	2.32e-56	0.000428	5.49e-05
	INIP	eQTLGen	ENSG00000148153	9	112683926	112718149	5.26e-192	1	7.12e-196	0.000135	9.24e-05
	FAM118B	eQTLGen	ENSG00000197798	11	126211724	126262984	0	1	0	0.000141	6.18e-05
	PITPNA	eQTLGen	ENSG00000174238	17	1517718	1562792	0	1	0	0.000174	0.000104
	AP2S1	eQTLGen	ENSG00000042753	19	46838136	46850846	0.99	0.0102	7.98e-05	8.21e-07	2.52e-06
	ELMO1	eQTLGen	ENSG00000155849	7	36852906	37449223	0	0.999	0	0.000954	0.000136
	MYO1C	eQTLGen	ENSG00000197879	17	1464186	1492686	2.63e-19	0.816	9.41e-21	0.029	0.154
	NEBL	eQTLGen	ENSG00000078114	10	20779973	21293011	4.46e-45	0.999	2.97e-48	0.000665	0.0002
	RAPGEF3	eQTLGen	ENSG00000079337	12	47734363	47771040	7.48e-07	0.999	4.14e-10	0.000553	0.000166
	EIF3D	eQTLGen	ENSG00000100353	22	36510855	36529184	0.873	0.126	0.000342	4.95e-05	2.6e-05
	OSER1	eQTLGen	ENSG00000132823	20	44195939	44210771	0	1	0	0.000207	4.7e-05
	STAG3	eQTLGen	ENSG00000066923	7	100177563	100221488	7.22e-99	1	4.29e-103	5.93e-05	6.88e-05
	MYO1F	eQTLGen	ENSG00000142347	19	8520778	8577577	1.16e-50	1	4.77e-54	0.000411	7.78e-05
	ZNF205	eQTLGen	ENSG00000122386	16	3112560	3120517	0	1	0	9.14e-05	4.88e-05
	NME5	eQTL_BrainMeta	ENSG00000112981	5	138115175	138139443	—	—	—	—	—
	SPCS3	eQTLGen	ENSG00000129128	4	176319966	176332245	0.8	0.2	0.000105	2.62e-05	3.03e-05
	SLC15A4	eQTLGen	ENSG00000139370	12	128793194	128823958	0.988	0.00962	0.00204	1.92e-05	0.000602
	SYTL2	eQTLGen	ENSG00000137501	11	85694224	85811159	4.75e-39	0.999	2.19e-42	0.00046	0.000106
	MAP3K14	mQTL_BrainMeta	ENSG00000006062	17	45263119	45317029	6.86e-13	1	7.36e-17	0.000107	5.28e-05
	NOL10	mQTL_BrainMeta	ENSG00000115761	2	10562347	10689987	3.09e-08	1	5.79e-12	0.000187	4.92e-05
	B3GAT1	mQTL_BrainMeta	ENSG00000109956	11	134378504	134412242	2.78e-26	1	4.84e-30	0.000174	5.15e-05
	PXDN	mQTL_BrainMeta	ENSG00000130508	2	1631887	1744852	0	1	0	0.000239	5.86e-05
	STK39	mQTL_McRae	ENSG00000198648	2	167954020	168247595	0.977	0.0219	0.00135	3.02e-05	3.46e-05
	BTN2A2	mQTL_McRae	ENSG00000124508	6	26383096	26394874	—	—	—	—	—
	PCBP4	mQTL_McRae	ENSG00000090097	3	51957454	51974016	1.19e-05	1	1.09e-09	9.18e-05	0.000223
	DIP2A	mQTL_McRae	ENSG00000160305	21	46458891	46570015	0	1	0	0.000223	5.11e-05
	HEXIM2	pQTL_FENLAND	ENSG00000168517	17	45160700	45170040	6.81e-74	1	4.05e-78	5.94e-05	4.71e-05
	TNFSF13B	pQTL_FENLAND	ENSG00000102524	13	108251240	108308484	0.984	0.0161	0.000274	4.49e-06	1.28e-05
	CD5L	pQTL_FENLAND	ENSG00000073754	1	157830911	157898256	—	—	—	—	—
	FAM20A	pQTL_FENLAND	ENSG00000108950	17	68535113	68601367	3.33e-45	1	2.24e-49	6.71e-05	6.4e-05
	TAGLN	pQTL_FENLAND	ENSG00000149591	11	117199370	117207464	5.98e-220	1	3.65e-224	6.09e-05	7.52e-05
	ALPP	pQTL_FENLAND	ENSG00000163283	2	232378724	232382889	—	—	—	—	—
	HTRA1	pQTL_FENLAND	ENSG00000166033	10	122458551	122514907	1.1e-162	1	1.15e-166	0.000104	5.13e-05
	RNASE4	pQTL_FENLAND	ENSG00000258818	14	20684560	20701216	—	—	—	—	—
	COMMD10	eQTLGen	ENSG00000145781	5	116085016	116412762	0.541	0.458	0.000223	0.000189	6.65e-05
	CDK10	eQTL_BrainMeta	ENSG00000185324	16	89680737	89696354	—	—	—	—	—
	MYBPC3	eQTL_GTEx_Whole_Blood	ENSG00000134571	11	47331406	47352702	0	1.35e-05	0	0.999	0.0008
	INVS	eQTLGen	ENSG00000119509	9	100099243	100302175	5.37e-215	0.98	8.44e-217	0.0154	0.00427
	NAA60	eQTLGen	ENSG00000122390	16	3443649	3486953	3.02e-213	0.944	7.34e-215	0.0229	0.033
	PRPSAP1	eQTLGen	ENSG00000161542	17	76309478	76384521	2.88e-72	0.78	7.89e-73	0.214	0.00645
	ARL17B	eQTL_BrainMeta	ENSG00000228696	17	46274784	46361797	1.02e-51	0.00131	7.78e-49	0.999	0.000144
	ZNF23	eQTLGen	ENSG00000167377	16	71447597	71463095	5.18e-216	0.97	1.34e-217	0.0251	0.00444
	TBK1	eQTLGen	ENSG00000183735	12	64452090	64502114	6.56e-23	0.958	9.98e-25	0.0145	0.0275
	HPS6	eQTLGen	ENSG00000166189	10	102065349	102068036	1.22e-85	0.849	8.99e-88	0.00613	0.145
	MAU2	eQTLGen	ENSG00000129933	19	19320829	19358754	0	0.768	0	0.0337	0.198
	THRA	eQTLGen	ENSG00000126351	17	40058290	40093867	0	0.96	0	0.032	0.00839
	LRRC37A	eQTL_GTEx_Whole_Blood	ENSG00000176681	17	46292733	46337794	1.55e-96	0.00183	8.44e-94	0.996	0.00206
	GTF2A2	eQTLGen	ENSG00000140307	15	59638062	59657541	0.74	0.243	0.0094	0.00308	0.00466
	CCDC82	eQTLGen	ENSG00000149231	11	96349241	96389956	4.81e-12	0.982	4.84e-15	0.000971	0.0168
	CCDC25	eQTL_BrainMeta	ENSG00000147419	8	27733316	27772653	3.25e-306	0.425	4.38e-306	0.572	0.00331
	BASP1	eQTLGen	ENSG00000176788	5	17065598	17276843	3.31e-232	0.941	1.93e-233	0.0547	0.00442
	MSRB2	eQTLGen	ENSG00000148450	10	23095579	23122013	1.47e-125	0.881	2.45e-127	0.0146	0.104
	EPHB4	eQTLGen	ENSG00000196411	7	100802565	100827523	1.49e-70	0.97	3.14e-72	0.0204	0.00959
	INPP5D	eQTLGen	ENSG00000168918	2	233059967	233207903	0.9	0.0561	0.0394	0.00245	0.00236
	NQO2	eQTLGen	ENSG00000124588	6	2987987	3019755	0	0.938	0	0.0227	0.0391
	SF3A1	eQTLGen	ENSG00000099995	22	30331988	30356919	6.48e-128	0.763	3.16e-129	0.037	0.2
	NIP7	eQTLGen	ENSG00000132603	16	69337996	69343106	5.03e-294	0.979	6.57e-296	0.0128	0.00856
	TTC38	eQTLGen	ENSG00000075234	22	46267961	46294008	0.867	0.0547	0.0702	0.00443	0.00315
	SLC66A2	eQTL_BrainMeta	ENSG00000122490	18	79902420	79951657	0	0.966	0	0.0285	0.00599
	PTPN12	eQTLGen	ENSG00000127947	7	77537295	77640069	5.57e-34	0.974	1.26e-35	0.022	0.00407
	BDH2	eQTLGen	ENSG00000164039	4	103077592	103099870	0.0221	0.947	0.000337	0.0144	0.0165
	OSBPL3	eQTLGen	ENSG00000070882	7	24796540	24981634	2.39e-163	0.949	1.19e-164	0.0471	0.0039
	GRAMD1B	eQTLGen	ENSG00000023171	11	123358428	123627774	2.75e-91	0.922	2.09e-92	0.0703	0.00786
	SMARCD2	eQTLGen	ENSG00000108604	17	63832081	63843065	1.18e-312	0.959	4.22e-314	0.0345	0.00621
	TNK2	eQTLGen	ENSG00000061938	3	195863364	195911945	0.144	0.821	0.00402	0.0228	0.0082
	PYGB	eQTLGen	ENSG00000100994	20	25248085	25298012	0	0.972	0	0.0232	0.0045
	TADA3	eQTLGen	ENSG00000171148	3	9779967	9793011	0	0.923	0	0.0226	0.0548
	RNF112	eQTLGen	ENSG00000128482	17	19411125	19417276	2.89e-74	0.812	9.54e-76	0.0267	0.161
	ABHD17C	eQTLGen	ENSG00000136379	15	80679684	80755621	9.08e-22	0.96	2.19e-23	0.0231	0.0171
	CHD7	eQTLGen	ENSG00000171316	8	60678740	60868028	0.646	0.328	0.0153	0.00777	0.00258
	TPK1	eQTLGen	ENSG00000196511	7	144451941	144836395	0	0.198	0	0.801	0.00121
	HECTD3	eQTLGen	ENSG00000126107	1	45002540	45011324	0.88	0.0332	0.08	0.00301	0.00358
	ZNF330	eQTLGen	ENSG00000109445	4	141220887	141234697	0.975	0.0105	0.0136	0.000146	0.000504
	MERTK	eQTLGen	ENSG00000153208	2	111898607	112029561	0.304	0.667	0.00716	0.0157	0.00616
	RPL9	eQTL_BrainMeta	ENSG00000163682	4	39452587	39458931	1.75e-135	0.977	2.24e-137	0.0125	0.0101
	CAPSL	eQTL_BrainMeta	ENSG00000152611	5	35904288	35938779	—	—	—	—	—
	POM121L2	mQTL_McRae	ENSG00000158553	6	27285903	27312273	—	—	—	—	—
	DOK7	mQTL_McRae	ENSG00000175920	4	3463306	3501473	5.31e-211	0.96	1.68e-212	0.0303	0.00981
	NMS	mQTL_McRae	ENSG00000204640	2	100470482	100483280	—	—	—	—	—
	IDH3A	mQTL_McRae	ENSG00000166411	15	78131498	78171945	0.000136	0.972	2.78e-06	0.0199	0.00836
	ABCA1	mQTL_McRae	ENSG00000165029	9	104781006	104928155	5.15e-47	0.017	2.98e-45	0.983	9.46e-05
	HABP4	mQTL_McRae	ENSG00000130956	9	96450169	96491336	—	—	—	—	—
	VPS13C	mQTL_McRae	ENSG00000129003	15	61852389	62060473	4.59e-07	0.936	2.91e-08	0.0593	0.00437
	VWDE	mQTL_McRae	ENSG00000146530	7	12330885	12403941	0	0.101	0	0.878	0.0214
	SPACA7	mQTL_McRae	ENSG00000153498	13	112376355	112434689	—	—	—	—	—
	F2RL3	mQTL_McRae	ENSG00000127533	19	16888999	16892606	1.58e-32	0.981	2.34e-34	0.0145	0.00468
	CDC7	mQTL_McRae	ENSG00000097046	1	91500851	91525764	1.12e-12	0.822	1.68e-14	0.0122	0.166
	TSC22D4	mQTL_McRae	ENSG00000166925	7	100463359	100479232	0.00228	0.1	0.000521	0.0221	0.875
	FAM171A1	mQTL_McRae	ENSG00000148468	10	15211643	15371289	5.35e-285	0.965	1.74e-286	0.0313	0.00412
	TMEM176B	mQTL_McRae	ENSG00000106565	7	150791285	150801360	1.57e-23	0.98	1.24e-25	0.00774	0.012
	FXYD6	mQTL_McRae	ENSG00000137726	11	117836976	117877486	0.00115	0.219	2.27e-05	0.00357	0.776
	IQCE	mQTL_BrainMeta	ENSG00000106012	7	2558972	2614733	2.43e-50	0.911	2e-51	0.0749	0.014
	ETV1	mQTL_McRae	ENSG00000006468	7	13891229	13991425	0.876	0.0485	0.0669	0.0037	0.00505
	WDR37	mQTL_BrainMeta	ENSG00000047056	10	1049538	1132384	6.93e-62	0.966	1.13e-63	0.0158	0.0186
	UBE2I	mQTL_BrainMeta	ENSG00000103275	16	1308880	1327018	6.04e-299	0.967	7.97e-301	0.0127	0.0199
	BRSK2	mQTL_McRae	ENSG00000174672	11	1389899	1462689	1.03e-05	0.967	3e-07	0.0282	0.00431
	LIMCH1	mQTL_McRae	ENSG00000064042	4	41359607	41700044	9.17e-41	0.927	6.76e-42	0.0683	0.00439
	TK2	mQTL_McRae	ENSG00000166548	16	66508003	66552544	0	0.974	0	0.0163	0.00949
	CRYGD	mQTL_McRae	ENSG00000118231	2	208121607	208124524	—	—	—	—	—
	KCNA6	mQTL_BrainMeta	ENSG00000151079	12	4809334	4813318	8.16e-07	0.983	6.07e-09	0.0073	0.0101
	CABP5	mQTL_BrainMeta	ENSG00000105507	19	48029383	48044079	0.971	0.0184	0.00931	0.000176	0.000574
	TRMT112	eQTLGen	ENSG00000173113	11	64316460	64317559	1.35e-59	0.97	3.13e-61	0.0225	0.00715
	RASA4B	sQTL_BrainMeta	ENSG00000170667	7	102479976	102517777	1.73e-42	0.977	1.17e-44	0.00664	0.0159
	HDHD2	pQTL_FENLAND	ENSG00000167220	18	47107408	47150500	4.22e-269	0.975	5.75e-271	0.0133	0.0113
	PPH4, posterior probability of H4; QTL, quantitative trait loci
	* Only presented the association with PPH4 > 0.5
	The"-"Indicates that no common genetic locus exists

## Sheet: Table S8
	Table S8. Colocalization analysis for association between eQTL, mQTL, sQTL, pQTL and PD in discovery stage
	gene	qtl_name	gene_id	chr	start	end	PP.H0.	PP.H1.	PP.H2.	PP.H3.	PP.H4.
	ENPP4	eQTLGen	ENSG00000001561	6	46129989	46146688	0	0.386	0	0.0527	0.561
	PDZK1IP1	eQTLGen	ENSG00000162366	1	47183582	47191044	6.69e-10	0.912	1.29e-11	0.0175	0.0701
	SCD5	eQTL_BrainMeta	ENSG00000145284	4	82629539	82798796	0.208	0.681	0.00925	0.0302	0.0712
	KCTD10	eQTLGen	ENSG00000110906	12	109448655	109477359	8.68e-15	0.855	2.03e-16	0.0199	0.125
	HFM1	eQTL_BrainMeta	ENSG00000162669	1	91260766	91404856	—	—	—	—	—
	CCDC3	eQTL_BrainMeta	ENSG00000151468	10	12896625	13099652	0	0.905	0	0.0862	0.00919
	GGPS1	eQTLGen	ENSG00000152904	1	235327350	235344532	9.1e-209	0.888	1.8e-210	0.0175	0.0948
	NT5DC2	eQTL_GTEx_Whole_Blood	ENSG00000168268	3	52524385	52535054	0	0.96	0	0.0305	0.00922
	ST6GALNAC1	eQTLGen	ENSG00000070526	17	76624761	76643786	0	0.942	0	0.033	0.0246
	C1orf52	mQTL_BrainMeta	ENSG00000162642	1	85249953	85259672	0.967	0.00792	0.0239	0.000195	0.000526
	SPATS2L	mQTL_McRae	ENSG00000196141	2	200305881	200482264	0.0029	0.94	0.00011	0.0357	0.0212
	NT5DC2	mQTL_McRae	ENSG00000168268	3	52524385	52535054	0	0.96	0	0.0305	0.00922
	TREX1	mQTL_McRae	ENSG00000213689	3	48465811	48467645	6.34e-160	0.959	8.86e-162	0.0134	0.0278
	SNX8	pQTL_FENLAND	ENSG00000106266	7	2251770	2354318	3.78e-16	0.945	1.74e-17	0.0436	0.0113
	BMPR2	eQTLGen	ENSG00000204217	2	202376327	202567751	0.772	0.18	0.0346	0.00807	0.00478
	ZNF91	eQTLGen	ENSG00000167232	19	23304991	23395471	—	—	—	—	—
	ARL6IP5	eQTLGen	ENSG00000144746	3	69084937	69106092	1.03e-87	0.9	4.59e-89	0.0401	0.0595
	ARHGAP5	eQTLGen	ENSG00000100852	14	32076114	32159728	0.919	0.0499	0.027	0.00146	0.00273
	GRAMD1A	eQTLGen	ENSG00000089351	19	34994784	35026471	7.87e-14	0.941	2.62e-15	0.0313	0.0272
	WDR6	mQTL_McRae	ENSG00000178252	3	49007062	49015953	0	0.703	0	0.0179	0.279
	PKDCC	mQTL_McRae	ENSG00000162878	2	42048021	42058517	5e-33	0.969	9.59e-35	0.0186	0.0125
	TRMT61A	mQTL_McRae	ENSG00000166166	14	103529196	103537073	0.873	0.104	0.0141	0.00167	0.00737
	PDE1C	mQTL_McRae	ENSG00000154678	7	31751179	32428131	—	—	—	—	—
	HAX1	mQTL_McRae	ENSG00000143575	1	154272589	154275875	7.38e-195	0.975	9.77e-197	0.0129	0.0122
	SIX5	mQTL_McRae	ENSG00000177045	19	45764785	45769252	0.934	0.0201	0.043	0.000926	0.00147
	PAM	pQTL_INTERVAL	ENSG00000145730	5	102753981	103029730	1.72e-156	0.898	1.32e-157	0.0692	0.0331
	EFEMP1	pQTL_FENLAND	ENSG00000115380	2	55865967	55924139	—	—	—	—	—
	CDNF	pQTL_INTERVAL	ENSG00000185267	10	14819245	14838575	0.689	0.278	0.0165	0.00663	0.00939
	MAGI2	pQTL_FENLAND	ENSG00000187391	7	78017055	79453667	7.26e-06	0.619	2.86e-06	0.244	0.137
	GGH	pQTL_FENLAND	ENSG00000137563	8	63014881	63039407	0.0253	0.931	0.000566	0.0208	0.0225
	PCGF3	sQTL_GTEx_Whole_Blood	ENSG00000185619	4	705748	770640	0	0.631	0	0.356	0.0127
	KPNA1	eQTLGen	ENSG00000114030	3	122421902	122514945	0.0339	0.924	0.00104	0.0283	0.0127
	ASF1A	eQTLGen	ENSG00000111875	6	118894152	118909171	3.75e-22	0.924	5.23e-24	0.0128	0.0629
	EIF3C	eQTL_BrainMeta	ENSG00000184110	16	28688558	28735727	8.41e-22	0.799	2.36e-24	0.00204	0.199
	CHRNB1	eQTLGen	ENSG00000170175	17	7445061	7457710	1.1e-283	0.395	4.77e-285	0.0166	0.588
	CNNM4	eQTLGen	ENSG00000158158	2	96760902	96811874	2.37e-20	0.973	2.84e-22	0.0116	0.0157
	CEP85L	eQTLGen	ENSG00000111860	6	118460772	118710075	1.05e-29	0.921	6.76e-31	0.0593	0.0201
	TRAT1	eQTLGen	ENSG00000163519	3	108822770	108855005	5.55e-20	0.954	1.14e-21	0.0195	0.0262
	SLC25A1	eQTLGen	ENSG00000100075	22	19175581	19178739	2.93e-220	0.449	2.16e-221	0.0326	0.518
	PCYOX1	eQTLGen	ENSG00000116005	2	70257386	70281185	1.61e-51	0.687	4.38e-53	0.0184	0.295
	ANKMY1	eQTL_BrainMeta	ENSG00000144504	2	240479422	240569209	0.949	0.0209	0.0285	0.000626	0.00118
	CERS5	eQTLGen	ENSG00000139624	12	50129289	50167533	5.29e-05	0.941	1.67e-06	0.0298	0.0293
	BOK	eQTLGen	ENSG00000176720	2	241551424	241574131	0.919	0.0553	0.0222	0.00133	0.00214
	IKBIP	eQTLGen	ENSG00000166130	12	98613405	98645113	0.00813	0.943	0.000252	0.0292	0.0193
	POMT2	eQTL_BrainMeta	ENSG00000009830	14	77274956	77320883	0.945	0.0256	0.0275	0.000743	0.00122
	SULT1A2	eQTLGen	ENSG00000197165	16	28591943	28597050	0	0.921	0	0.0173	0.0619
	KCNB1	eQTLGen	ENSG00000158445	20	49293394	49484297	8.95e-64	0.77	3.84e-65	0.0329	0.197
	GLIS3	eQTLGen	ENSG00000107249	9	3824127	4348392	7.74e-18	0.848	1.29e-18	0.141	0.0109
	GNPDA2	eQTLGen	ENSG00000163281	4	44682200	44726588	6.58e-65	0.777	3.54e-66	0.0416	0.182
	IL15	eQTL_BrainMeta	ENSG00000164136	4	141636583	141733987	0.952	0.0212	0.0242	0.000537	0.0017
	TMEM200A	eQTLGen	ENSG00000164484	6	130366017	130443067	0.581	0.385	0.0147	0.00974	0.00993
	DAP	eQTLGen	ENSG00000112977	5	10679230	10761234	0	0.799	0	0.0395	0.161
	CCNL1	eQTLGen	ENSG00000163660	3	157146508	157160760	2e-55	0.958	4.7e-57	0.0225	0.019
	PRR4	eQTLGen	ENSG00000111215	12	10845849	10849475	5.21e-13	0.96	9.5e-15	0.0175	0.0225
	PI3	eQTLGen	ENSG00000124102	20	45174902	45176544	0	0.847	0	0.0212	0.131
	PDCD1LG2	eQTLGen	ENSG00000197646	9	5510531	5571282	2.25e-97	0.822	1.53e-98	0.0556	0.122
	TMEM50A	eQTLGen	ENSG00000183726	1	25338317	25362361	1.16e-18	0.945	3.1e-20	0.0253	0.0292
	ANKRD26	eQTLGen	ENSG00000107890	10	26973793	27100494	6.38e-14	0.864	4.02e-15	0.0544	0.0814
	RCBTB1	eQTL_BrainMeta	ENSG00000136144	13	49531946	49585558	2.61e-27	0.954	6.41e-29	0.0234	0.0223
	FHOD1	eQTLGen	ENSG00000135723	16	67229387	67247481	5.46e-297	0.837	8.75e-299	0.0133	0.15
	CMTR2	eQTLGen	ENSG00000180917	16	71281389	71289715	0	0.895	0	0.0144	0.0907
	ANAPC4	eQTLGen	ENSG00000053900	4	25377263	25418498	0	0.889	0	0.0396	0.0716
	PMM1	eQTLGen	ENSG00000100417	22	41576900	41589871	1.03e-85	0.917	3.11e-87	0.0277	0.0555
	HORMAD1	eQTLGen	ENSG00000143452	1	150698060	150720895	7.67e-209	0.904	2.41e-210	0.0284	0.068
	APBB1IP	eQTLGen	ENSG00000077420	10	26438341	26567803	0.000547	0.846	8.82e-05	0.136	0.0166
	PLXDC2	eQTLGen	ENSG00000120594	10	19816239	20289856	8.83e-28	0.866	1.24e-28	0.121	0.0129
	SLC1A7	eQTL_BrainMeta	ENSG00000162383	1	53087179	53142638	1.72e-56	0.896	1.42e-57	0.0739	0.0304
	CD274	eQTLGen	ENSG00000120217	9	5450503	5470566	7.64e-92	0.837	4.91e-93	0.0537	0.109
	SETDB1	mQTL_McRae	ENSG00000143379	1	150926263	150964744	1.21e-44	0.734	5.46e-46	0.0329	0.233
	OAZ2	mQTL_McRae	ENSG00000180304	15	64687573	64703281	0.958	0.0256	0.0152	0.000404	0.00115
	BAMBI	mQTL_McRae	ENSG00000095739	10	28677510	28682932	0.874	0.0798	0.0355	0.00324	0.00721
	KCNA6	mQTL_McRae	ENSG00000151079	12	4809334	4813318	8.07e-07	0.969	1.72e-08	0.0207	0.0102
	GLT8D2	mQTL_McRae	ENSG00000120820	12	103988987	104064183	0.948	0.0207	0.0293	0.000639	0.00132
	ESPNL	mQTL_McRae	ENSG00000144488	2	238100340	238133287	0.291	0.00576	0.647	0.0127	0.0429
	BAG4	mQTL_BrainMeta	ENSG00000156735	8	38176533	38213301	4.14e-118	0.391	5.53e-119	0.0517	0.557
	GAPDHS	mQTL_McRae	ENSG00000105679	19	35533455	35545319	—	—	—	—	—
	SINHCAF	mQTL_BrainMeta	ENSG00000139146	12	31280584	31327058	0.851	0.126	0.0143	0.0021	0.00755
	STK3	mQTL_McRae	ENSG00000104375	8	98371228	98942827	0.896	0.0451	0.0529	0.00266	0.00356
	SMCO1	mQTL_McRae	ENSG00000214097	3	196506879	196515346	—	—	—	—	—
	GIPC2	mQTL_McRae	ENSG00000137960	1	77979542	78138444	—	—	—	—	—
	ANGPTL3	pQTL_FENLAND	ENSG00000132855	1	62597520	62606313	—	—	—	—	—
	PSG4	pQTL_FENLAND	ENSG00000243137	19	43192702	43207299	—	—	—	—	—
	PLA2G2A	pQTL_FENLAND	ENSG00000188257	1	19975431	19980416	—	—	—	—	—
	HGFAC	pQTL_FENLAND	ENSG00000109758	4	3441968	3449486	—	—	—	—	—
	ECHDC3	sQTL_BrainMeta	ENSG00000134463	10	11742366	11764070	0	0.944	0	0.042	0.0136
	MEI1	eQTL_BrainMeta	ENSG00000167077	22	41699503	41799456	0	0.435	0	0.134	0.431
	INIP	eQTLGen	ENSG00000148153	9	112683926	112718149	4.88e-192	0.925	1.67e-193	0.0317	0.0437
	CAND2	eQTLGen	ENSG00000144712	3	12796472	12871916	0	0.951	0	0.0326	0.0168
	ZFP90	eQTLGen	ENSG00000184939	16	68530090	68576072	0	0.963	0	0.027	0.0101
	RPL37A	eQTLGen	ENSG00000197756	2	216498825	216579180	0.825	0.0378	0.126	0.00579	0.00481
	DOCK7	eQTLGen	ENSG00000116641	1	62454298	62688386	0.833	0.0789	0.0766	0.00725	0.00418
	LHFPL2	eQTLGen	ENSG00000145685	5	78485215	78770021	0.886	0.0418	0.0661	0.00312	0.00282
	NCAPD2	eQTLGen	ENSG00000010292	12	6493356	6531955	0	0.951	0	0.0363	0.0122
	STK11	eQTLGen	ENSG00000118046	19	1177558	1228431	3.62e-154	0.952	1.08e-155	0.0284	0.0193
	CD1E	eQTLGen	ENSG00000158488	1	158353696	158357553	2.9e-226	0.875	1.51e-227	0.0455	0.0796
	COL23A1	eQTLGen	ENSG00000050767	5	178237476	178590393	0.0173	0.883	0.00163	0.0832	0.0152
	SRGAP2C	eQTLGen	ENSG00000171943	1	121184811	121392874	1.82e-269	0.967	3.57e-271	0.019	0.0145
	ANGEL2	eQTLGen	ENSG00000174606	1	212992182	213015867	6.03e-17	0.956	1.59e-18	0.0252	0.0185
	SESN1	eQTLGen	ENSG00000080546	6	108984309	109094846	1.06e-27	0.928	3.73e-29	0.0325	0.0392
	IQCE	eQTLGen	ENSG00000106012	7	2558972	2614733	2.29e-50	0.865	2.38e-51	0.09	0.045
	TIGAR	eQTL_BrainMeta	ENSG00000078237	12	4307763	4360028	4.6e-93	0.954	1.56e-94	0.0323	0.0134
	SLC18A2	eQTLGen	ENSG00000165646	10	117241093	117279430	3.21e-119	0.937	1.8e-120	0.0524	0.0104
	CCDC25	eQTL_BrainMeta	ENSG00000147419	8	27733316	27772653	7.28e-306	0.957	2.32e-307	0.0305	0.0123
	UHMK1	eQTLGen	ENSG00000152332	1	162497251	162529631	2.62e-123	0.975	3.47e-125	0.0129	0.0121
	TEF	eQTLGen	ENSG00000167074	22	41367333	41399326	2.67e-249	0.559	1.24e-250	0.0254	0.416
	APOBEC3D	eQTLGen	ENSG00000243811	22	39021113	39033277	0.938	0.0387	0.0187	0.000766	0.0038
	TRPM6	eQTLGen	ENSG00000119121	9	74722495	74888094	0	0.948	0	0.0412	0.011
	LSM8	eQTLGen	ENSG00000128534	7	118184144	118204035	0	0.973	0	0.0144	0.0131
	INTS1	eQTLGen	ENSG00000164880	7	1470277	1504389	0	0.931	0	0.0564	0.0126
	ZNF329	eQTLGen	ENSG00000181894	19	58126248	58155110	0.895	0.0712	0.0282	0.00224	0.00306
	LRRN1	eQTLGen	ENSG00000175928	3	3799431	3849834	1.26e-141	0.95	5.01e-143	0.0378	0.0118
	RBBP8	eQTLGen	ENSG00000101773	18	22798261	23026488	0	0.96	0	0.0188	0.021
	INTS5	eQTLGen	ENSG00000185085	11	62646848	62653302	1.6e-67	0.973	2.52e-69	0.0154	0.0112
	SUSD1	eQTLGen	ENSG00000106868	9	112040783	112175297	0	0.941	0	0.0471	0.0117
	OCEL1	eQTLGen	ENSG00000099330	19	17226213	17229219	1.51e-72	0.964	2.33e-74	0.0149	0.0214
	PHC1	eQTLGen	ENSG00000111752	12	8913896	8941467	0.00527	0.82	0.000491	0.0763	0.0982
	TUB	eQTLGen	ENSG00000166402	11	8019244	8106243	1.43e-18	0.941	7.17e-20	0.0473	0.012
	THRA	eQTLGen	ENSG00000126351	17	40058290	40093867	0	0.949	0	0.0187	0.0324
	TBK1	eQTLGen	ENSG00000183735	12	64452090	64502114	6.53e-23	0.953	1.34e-24	0.0196	0.0271
	RNF10	eQTLGen	ENSG00000022840	12	120533480	120577588	1.13e-18	0.953	3.05e-20	0.0258	0.0207
	RAB11FIP3	mQTL_McRae	ENSG00000090565	16	425649	523011	1.21e-21	0.699	5.85e-23	0.0335	0.268
	VWDE	mQTL_McRae	ENSG00000146530	7	12330885	12403941	0	0.839	0	0.117	0.0436
	SH2D7	mQTL_McRae	ENSG00000183476	15	78077808	78104370	—	—	—	—	—
	UXS1	mQTL_BrainMeta	ENSG00000115652	2	106093308	106194301	0.924	0.0249	0.0486	0.00131	0.00154
	HLCS	mQTL_McRae	ENSG00000159267	21	36748626	36990236	0	0.925	0	0.0601	0.0151
	ANKLE2	mQTL_McRae	ENSG00000176915	12	132725503	132761832	0.972	0.0103	0.0168	0.000177	0.000886
	TMPRSS6	mQTL_McRae	ENSG00000187045	22	37065436	37109713	0.96	0.0168	0.0221	0.000386	0.00118
	WT1	mQTL_BrainMeta	ENSG00000184937	11	32387775	32435564	—	—	—	—	—
	SPTBN5	mQTL_BrainMeta	ENSG00000137877	15	41848146	41894053	2.41e-37	0.971	3.36e-39	0.0135	0.0154
	USP33	mQTL_McRae	ENSG00000077254	1	77695987	77759852	0.707	0.259	0.0178	0.00651	0.00943
	DEFA4	mQTL_McRae	ENSG00000164821	8	6935820	6938306	0.759	0.19	0.0304	0.00757	0.0133
	TAPT1	mQTL_McRae	ENSG00000169762	4	16160505	16227410	2.6e-206	0.952	9.75e-208	0.0357	0.0125
	PDXP	mQTL_McRae	ENSG00000241360	22	37658723	37666932	0.967	0.0131	0.0186	0.000252	0.000878
	PARD3	mQTL_BrainMeta	ENSG00000148498	10	34109560	34815325	0.247	0.569	0.0419	0.0965	0.0458
	MFGE8	pQTL_FENLAND	ENSG00000140545	15	88898683	88913468	0.955	0.0153	0.0276	0.000439	0.00136
	FCN1	pQTL_INTERVAL	ENSG00000085265	9	134903232	134917912	0	0.958	0	0.0334	0.00874
	PEX6	eQTL_BrainMeta	ENSG00000124587	6	42963865	42979181	0	0.913	0	0.0182	0.0693
	PPH4, posterior probability of H4; QTL, quantitative trait loci
	* Only presented the association with PPH4 > 0.5
	The"-"Indicates that no common genetic locus exists

## Sheet: Table S9
	Table S9. Machine Learning analysis between Gene and NDDs in Study
	Disease	gene	Rank	dropout_loss	Model
	AD	IQCE	5	2.22045e-16	GLM
		COMMD10	4	1.59082e-08	GLM
		HDHD2	3	4.65288e-08	GLM
		HEXIM2	2	0.223607	GLM
		ALPP	1	0.497538	GLM
		IQCE	5	0.494413	DT
		UBE2I	4	0.494413	DT
		KCNA6	3	0.494413	DT
		TRMT112	2	0.494413	DT
		Type	1	0.494413	DT
		NME5	5	0.486915	KNN
		IQCE	4	0.487051	KNN
		CAPSL	3	0.492063	KNN
		ETV1	2	0.49335	KNN
		ABCA1	1	0.49466	KNN
		DIP2A	5	0.61036	LASSO
		GTF2A2	4	0.612454	LASSO
		TMEM176B	3	0.616672	LASSO
		F2RL3	2	0.621487	LASSO
		RNF112	1	0.625773	LASSO
		NMS	5	0.56505	NNET
		MYO1F	4	0.569041	NNET
		DOK7	3	0.56994	NNET
		SLC15A4	2	0.571499	NNET
		TMEM176B	1	0.578072	NNET
		TMEM176B	5	0.528726	RF
		NMS	4	0.528832	RF
		HDHD2	3	0.529027	RF
		MYO1F	2	0.529268	RF
		HABP4	1	0.530273	RF
		HABP4	5	0.565742	SVM
		IQCE	4	0.568	SVM
		GTF2A2	3	0.568375	SVM
		TMEM176B	2	0.571056	SVM
		RNF112	1	0.581365	SVM
	PD	DAP	5	0.628428	GLM
		KPNA1	4	0.631319	GLM
		PLXDC2	3	0.632008	GLM
		ASF1A	2	0.639027	GLM
		PAM	1	0.648502	GLM
		TRMT61A	5	0.524593	KNN
		ZNF329	4	0.525014	KNN
		LHFPL2	3	0.525072	KNN
		ZNF91	2	0.528188	KNN
		WDR6	1	0.529304	KNN
		HAX1	5	0.562068	LASSO
		Type	4	0.562068	LASSO
		PI3	3	0.562684	LASSO
		STK11	2	0.569866	LASSO
		TAPT1	1	0.569878	LASSO
		FCN1.1	5	0.546408	NNET
		TMEM50A	4	0.547314	NNET
		SULT1A2	3	0.551538	NNET
		USP33	2	0.553686	NNET
		WDR6	1	0.559958	NNET
		BAG4	5	0.454022	RF
		CHRNB1	4	0.457512	RF
		LHFPL2	3	0.462836	RF
		STK3	2	0.465381	RF
		IL15	1	0.466721	RF
		TRPM6	5	0.537173	SVM
		FLJ13224	4	0.53865	SVM
		CNNM4	3	0.539583	SVM
		TAPT1	2	0.545853	SVM
		UXS1	1	0.546022	SVM
	* Only presented the association with Rank < 6

[truncated: 4 more sheets: Table S10, Table S11, Table S12, Table S13]
